# Supplementary material for: Direct C–H heteroarylation of azoles with 1,2-di(pyrimidin-2-yl)disulfides through C–S cleavage of disulfides
Source: Royal Society of Chemistry journal article supplement (doi:10.1039/c6ra18997k), 2016-01-01

## Supporting Information

### Direct C-H Heteroarylation of Azoles with 1,2-Di(pyrimidin-2-yl)disulfides through C-S Cleavage of Disulfides

E-mail: quanzhengjun@hotmail.com, wangxicun@nwnu.edu.cn

#### Table of Contents

|                                                                       |     |
|-----------------------------------------------------------------------|-----|
| Table of contents.....                                                | s0  |
| General .....                                                         | s1  |
| Experimental details and characterization data for all compounds..... | s2  |
| Copies of the NMR Spectra for All Products .....                      | s11 |

#### 1. General

<sup>1</sup>H NMR and <sup>13</sup>C NMR data analyses were performed with a Varian Mercury plus-400 instrument and plus-600 instrument unless otherwise specified. Dual-beam infrared spectrophotometer CDCl<sub>3</sub> as solvent and tetramethylsilane (TMS) as the internal standard were employed. Chemical shifts were reported in units (ppm) by assigning TMS resonance in the <sup>1</sup>H NMR spectrum as 0.00 ppm. The data of <sup>1</sup>H NMR was reported as follows: chemical shift, multiplicity (s = singlet, d = doublet, t = triplet, m = multiplet and br = broad), coupling constant (J values) in Hz and integration. Chemical shift for <sup>13</sup>C NMR spectrawere recorded in ppm from TMS using the central peak of CDCl<sub>3</sub> (77.0ppm) as the internal standard. Flash chromatography was performed using 200-300 mesh silica gel with the indicated solvent system according to standard techniques. Analytical thin-layer chromatography (TLC) was performed on pre-coated, glass-backed silica gel plates. Melting points were measured with an XT-4 apparatus. High-resolution mass spectra (HRMS) (ESI) were obtained with a Bruker Daltonics APEX II 47e and Orbitrap Elite mass spectrometer. Column chromatography was generally performed on silica gel (200–300 mesh) and TLC analyses were conducted on silica gel GF254 plates.

## **2. Experimental details and characterization data for all compounds.**

**2.1 General procedure for the synthesis of 3aa.** Under an atmosphere of nitrogen, disulfide 1a (1 mmol, 0.546g), benzoxazole 2a (3 mmol, 0.357g), Pd(OAc)<sub>2</sub> (0.05mmol, 0.011g), CuTC (2.0mmol, 0.382g) dppp (0.1mmol, 0.041) and Cs<sub>2</sub>CO<sub>3</sub> (3mmol, 0.978g) were added to an oven-dried Schlenk tube. The tube was stoppered and degassed with nitrogen three times. Water-free dioxane (3 mL) was added by syringe and the mixture was stirred for 18 h at 120°C and the reaction was monitored by TLC analysis. Then, 2mL diluted hydrochloric acid were added to the mixture to quench the reaction and extracted with ethyl acetate (3×100 mL). The combined organic layers were washed with aqueous NaHCO<sub>3</sub> and brine, dried over MgSO<sub>4</sub>, filtered, and the volatiles were removed in vacuo. The residue was purified by column chromatography on silica gel (ethyl acetate/ petroleum ether 1:30) to give the corresponding products.

**2.2 General procedure for the synthesis of 5aa.** Under an atmosphere of nitrogen, disulfide 1a (1 mmol, 0.546g), benzothiazole 4a (3 mmol, 0.456g), Pd(OAc)<sub>2</sub> (0.05mmol, 0.011g), CuTC (2.0mmol, 0.382g) PCy<sub>3</sub> (0.1mmol, 0.028) and <sup>t</sup>BuOK (3mmol, 0.337g) were added to an oven-dried Schlenk tube. The tube was stoppered and degassed with nitrogen three times. Water-free DMA (3 mL) was added by syringe and the mixture was stirred for 18h at 140°C and the reaction was monitored by TLC analysis. Then, 2mL diluted hydrochloric acid were added to the mixture to quench the reaction and extracted with ethyl acetate (3×100 mL). The combined organic layers were washed with aqueous NaHCO<sub>3</sub> and brine, dried over MgSO<sub>4</sub>, filtered, and the volatiles were removed in vacuo. The residue was purified by column chromatography on silica gel (ethyl acetate/ petroleum ether 1:30) to give the corresponding products.

## 2.2 Characterization Data for the Isolated Products.

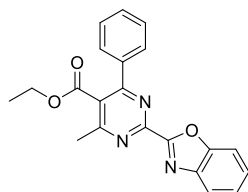

**Ethyl 2-(benzo[d]oxazol-2-yl)-4-methyl-6-phenylpyrimidine-5-carboxylate (3aa).** Yellow solid, m.p. = 166-167 °C. <sup>1</sup>H NMR (600 MHz, CDCl<sub>3</sub>): δ 7.94 (d, *J* = 7.8 Hz, 1H), 7.78-7.76 (m, 2H), 7.72 (d, *J* = 7.8 Hz, 1H), 7.51 – 7.46 (m, 4H), 7.43 (t, *J* = 7.2 Hz, 1H), 4.25 (q, *J* = 7.2 Hz, 2H), 2.80 (s, 3H), 1.10 (t, *J* = 7.2 Hz, 3H); <sup>13</sup>C NMR (150 MHz, CDCl<sub>3</sub>): δ 167.30, 166.59, 164.59, 159.40, 141.79, 136.98, 130.47, 128.69, 128.55, 126.99, 126.26, 125.25, 123.32, 121.65, 111.60, 109.99, 62.22, 22.83, 13.63; HRMS (ESI<sup>+</sup>) *m/z*: Calcd for C<sub>21</sub>H<sub>18</sub>N<sub>3</sub>O<sub>3</sub> [M+H]<sup>+</sup> 360.1343, Found 360.1347.

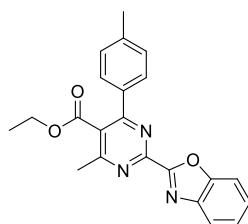

**Ethyl 2-(benzo[d]oxazol-2-yl)-4-methyl-6-(p-tolyl)pyrimidine-5-carboxylate (3ba).** Yellow solid, m.p. = 165-166 °C. <sup>1</sup>H NMR (600 MHz, CDCl<sub>3</sub>): δ 7.91 (d, *J* = 7.8 Hz, 1H), 7.68 – 7.67 (m, 3H), 7.44 (t, *J* = 7.8 Hz, 1H), 7.39 (t, *J* = 7.2 Hz, 1H), 7.27 (d, *J* = 7.8 Hz, 2H), 4.25 (q, *J* = 7.2 Hz, 2H), 2.76 (s, 3H), 2.39 (s, 3H), 1.13 (t, *J* = 7.2 Hz, 3H); <sup>13</sup>C NMR (150 MHz, CDCl<sub>3</sub>): δ 167.51, 166.34, 164.33, 159.54, 154.19, 151.28, 141.71, 140.91, 134.03, 129.40, 128.55, 126.91, 125.99, 125.71, 125.19, 121.58, 111.56, 62.18, 22.78, 21.42, 13.70; HRMS (ESI<sup>+</sup>) *m/z*: Calcd for C<sub>22</sub>H<sub>20</sub>N<sub>3</sub>O<sub>3</sub> [M+H]<sup>+</sup> 374.1499, Found 374.1492.

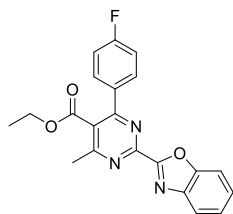

**Ethyl 2-(benzo[d]oxazol-2-yl)-4-(4-fluorophenyl)-6-methylpyrimidine-5-carboxylate (3ca).** Yellow solid, m.p. = 179-180 °C. <sup>1</sup>H NMR (600 MHz, CDCl<sub>3</sub>): δ 7.94 (d, *J* = 7.8 Hz, 1H), 7.81 – 7.79 (m, 2H), 7.72 (d, *J* = 7.8 Hz, 1H), 7.48 (t, *J* = 7.2 Hz, 1H), 7.43 (t, *J* = 7.2 Hz, 1H), 7.19 (t, *J* = 8.4 Hz, 2H), 4.28 (q, *J* = 7.2 Hz, 2H), 2.79 (s, 3H), 1.16 (t, *J* = 7.2 Hz, 3H); <sup>13</sup>C NMR (150 MHz, CDCl<sub>3</sub>): δ 167.24, 166.71, 165.11, 163.44, 163.29, 159.34, 154.26, 151.31, 141.70, 130.82, 130.76, 127.07, 126.08, 125.31, 121.66, 115.97, 115.82, 111.59, 62.34, 22.84, 13.74; HRMS (ESI<sup>+</sup>) *m/z*: Calcd for C<sub>21</sub>H<sub>17</sub>FN<sub>3</sub>O<sub>3</sub> [M+H]<sup>+</sup> 378.1248, Found 378.1254.

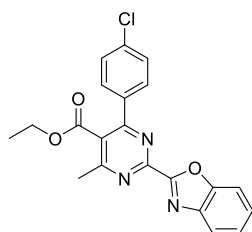

**Ethyl 2-(benzo[d]oxazol-2-yl)-4-(4-chlorophenyl)-6-methylpyrimidine-5-carboxylate (3da).** Yellow solid, m.p. = 147-148 °C. <sup>1</sup>H NMR (600 MHz, CDCl<sub>3</sub>): δ 7.92 (d, *J* = 7.2 Hz, 1H), 7.69 (m, 3H), 7.45 (t, *J* = 7.2 Hz, 1H), 7.40 (t, *J* = 7.2 Hz, 1H), 7.28 (d, *J* = 7.2 Hz, 2H), 4.26 (q, *J* = 7.2 Hz, 2H), 2.77 (s, 3H), 1.14 (t, *J* = 7.2 Hz, 3H); <sup>13</sup>C NMR (150 MHz, CDCl<sub>3</sub>): δ 167.52, 166.34, 164.35, 159.55, 154.20, 151.29, 141.73, 140.91, 134.04, 129.40, 128.55, 126.91, 126.00, 125.20, 121.60, 111.57, 62.18, 22.79, 13.71; HRMS (ESI<sup>+</sup>) *m/z*: Calcd for C<sub>21</sub>H<sub>17</sub>ClN<sub>3</sub>O<sub>3</sub> [M+H]<sup>+</sup> 394.0953, Found 394.0951.

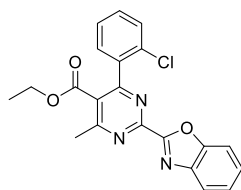

**Ethyl 2-(benzo[d]oxazol-2-yl)-4-(2-chlorophenyl)-6-methylpyrimidine-5-carboxylate (3ea).** Yellow solid, m.p. = 195-197 °C. <sup>1</sup>H NMR (600 MHz, CDCl<sub>3</sub>): δ 7.92 (d, *J* = 7.2 Hz, 1H), 7.70 (d, *J* = 8.4 Hz, 1H), 7.47-7.36 (m, 6H), 4.13 (q, *J* = 7.2 Hz, 2H), 2.88 (s, 3H), 0.97 (t, *J* = 7.2 Hz, 3H); <sup>13</sup>C NMR (150 MHz, CDCl<sub>3</sub>) δ 167.64, 165.61, 164.50, 159.22, 154.31, 151.35, 141.71, 136.59, 132.36, 130.64, 130.24, 129.58, 128.65, 127.12, 126.76, 125.31, 121.68, 111.67, 61.98, 23.52, 13.44; HRMS (ESI<sup>+</sup>) *m/z*: Calcd for C<sub>21</sub>H<sub>17</sub>ClN<sub>3</sub>O<sub>3</sub> [M+H]<sup>+</sup> 394.0953, Found 394.0948.

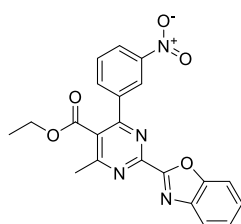

**Ethyl 2-(benzo[d]oxazol-2-yl)-4-methyl-6-(3-nitrophenyl)pyrimidine-5-carboxylate (3fa).** Yellow solid, m.p. = 153-154 °C. <sup>1</sup>H NMR (600 MHz, CDCl<sub>3</sub>): δ 8.65 (s, 1H), 8.39 (d, *J* = 8.4 Hz, 1H), 8.15 (d, *J*

= 7.8 Hz, 1H), 7.95 (d,  $J$  = 7.8 Hz, 1H), 7.74-7.70 (m, 2H), 7.49 (t,  $J$  = 7.2 Hz, 1H), 7.44 (t,  $J$  = 7.2 Hz, 1H), 4.33 (q,  $J$  = 7.2 Hz, 2H), 2.84 (s, 3H), 1.21 (t,  $J$  = 7.2 Hz, 3H);  $^{13}\text{C}$  NMR (150 MHz,  $\text{CDCl}_3$ ):  $\delta$  167.41, 166.59, 161.92, 154.52, 148.36, 141.66, 138.43, 134.63, 129.95, 127.31, 126.34, 125.44, 125.12, 123.64, 121.74, 111.64, 62.71, 23.02, 13.77; HRMS (ESI<sup>+</sup>)  $m/z$ : Calcd for  $\text{C}_{21}\text{H}_{17}\text{N}_4\text{O}_5$  [M+H]<sup>+</sup> 405.1193, Found 405.1191.

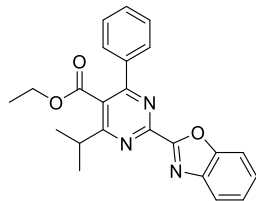

**Ethyl 2-(benzo[d]oxazol-2-yl)-4-isopropyl-6-phenylpyrimidine-5-carboxylate (3ga).** Yellow solid, m.p. = 150-152 °C.  $^1\text{H}$  NMR (600 MHz,  $\text{CDCl}_3$ ):  $\delta$  7.95 (d,  $J$  = 7.8 Hz, 1H), 7.77 (d,  $J$  = 5.4 Hz, 2H), 7.71 (d,  $J$  = 7.8 Hz, 1H), 7.50-7.44 (m, 4H), 7.41 (t,  $J$  = 7.8 Hz, 1H), 4.23 (q,  $J$  = 7.2 Hz, 2H), 3.33-3.30 (m, 1H), 1.47 (d,  $J$  = 6.6 Hz, 6H), 1.09 (t,  $J$  = 7.2 Hz, 3H);  $^{13}\text{C}$  NMR (150 MHz,  $\text{CDCl}_3$ ):  $\delta$  174.17, 167.49, 164.49, 159.81, 154.77, 151.28, 141.85, 137.21, 130.28, 128.63, 128.56, 127.51, 126.76, 125.74, 125.57, 125.06, 121.65, 121.49, 111.52, 62.15, 33.79, 21.72, 13.64; HRMS (ESI<sup>+</sup>)  $m/z$ : Calcd for  $\text{C}_{23}\text{H}_{22}\text{N}_3\text{O}_3$  [M+H]<sup>+</sup> 388.1656, Found 388.1652.

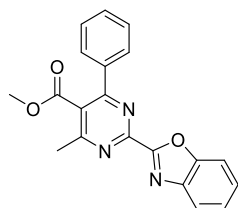

**Methyl 2-(benzo[d]oxazol-2-yl)-4-methyl-6-phenylpyrimidine-5-carboxylate (3ha).** White solid, m.p. = 167-168 °C.  $^1\text{H}$  NMR (600 MHz,  $\text{CDCl}_3$ ):  $\delta$  7.93 (d,  $J$  = 7.8 Hz, 1H), 7.77 (d,  $J$  = 8.4 Hz, 2H), 7.71 (d,  $J$  = 7.8 Hz, 1H), 7.50 – 7.40 (m, 5H), 3.75 (s, 3H), 2.78 (s, 3H);  $^{13}\text{C}$  NMR (150 MHz,  $\text{CDCl}_3$ ):  $\delta$  167.88, 166.67, 164.44, 159.43, 154.37, 151.32, 141.72, 136.85, 130.61, 128.79, 128.46, 127.01, 125.89, 125.26, 121.64, 111.59, 52.86, 22.87; HRMS (ESI<sup>+</sup>)  $m/z$ : Calcd for  $\text{C}_{20}\text{H}_{16}\text{N}_3\text{O}_3$  [M+H]<sup>+</sup> 346.1186, Found 346.1188.

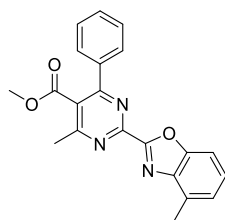

**Methyl 4-methyl-2-(4-methylbenzo[d]oxazol-2-yl)-6-phenylpyrimidine-5-carboxylate (3hb).** Yellow solid, m.p. = 154-155 °C.  $^1\text{H}$  NMR (600 MHz,  $\text{CDCl}_3$ ):  $\delta$  7.77 (d,  $J$  = 4.8 Hz, 2H), 7.70 (s, 1H), 7.58 (d,  $J$  = 8.4 Hz, 1H), 7.51 (s, 3H), 7.27 (d,  $J$  = 8.4 Hz, 1H), 3.76 (s, 3H), 2.78 (s, 3H), 2.50 (s, 3H);  $^{13}\text{C}$  NMR (150 MHz,  $\text{CDCl}_3$ )  $\delta$  167.92, 166.63, 164.43, 159.48, 154.45, 149.51, 141.95, 136.91, 135.24, 130.58, 128.78, 128.46, 128.38, 125.79, 121.29, 110.95, 52.85, 22.88, 21.54; HRMS (ESI<sup>+</sup>)  $m/z$ : Calcd for  $\text{C}_{21}\text{H}_{18}\text{N}_3\text{O}_3$  [M+H]<sup>+</sup> 360.1343, Found 360.1341.

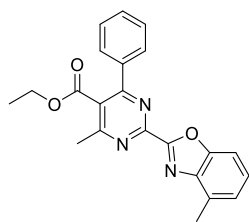

**Ethyl 4-methyl-2-(4-phenylbenzo[d]oxazol-2-yl)-6-phenylpyrimidine-5-carboxylate (3ab).** Light yellow oil.  $^1\text{H NMR}$  (400 MHz,  $\text{CDCl}_3$ ):  $\delta$  7.80 – 7.75 (m, 3H), 7.50-7.49 (m, 4H), 7.24 (d,  $J = 8.4$  Hz, 1H), 4.24 (q,  $J = 7.2$  Hz, 2H), 2.79 (s, 3H), 2.53 (s, 3H), 1.10 (t,  $J = 7.2$  Hz, 3H);  $^{13}\text{C NMR}$  (100 MHz,  $\text{CDCl}_3$ ):  $\delta$  167.34, 166.51, 164.55, 159.02, 154.35, 151.66, 139.62, 137.79, 137.04, 130.42, 128.67, 128.55, 126.73, 126.07, 120.95, 111.55, 62.18, 22.82, 22.01, 13.62; HRMS ( $\text{ESI}^+$ )  $m/z$ : Calcd for  $\text{C}_{22}\text{H}_{20}\text{N}_3\text{O}_3$  [ $\text{M}+\text{H}$ ] $^+$  374.1499, Found 374.1496.

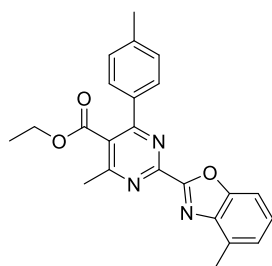

**Ethyl 4-methyl-2-(4-methylbenzo[d]oxazol-2-yl)-6-(p-tolyl)pyrimidine-5-carboxylate (3bb).** Grey solid, m.p. = 154-156 °C.  $^1\text{H NMR}$  (400 MHz,  $\text{CDCl}_3$ ):  $\delta$  7.62 (d,  $J = 8.0$  Hz, 3H), 7.51 (d,  $J = 8.4$  Hz, 1H), 7.20 (d,  $J = 9.2$  Hz, 3H), 4.21 (q,  $J = 7.2$  Hz, 2H), 2.71 (s, 3H), 2.44 (s, 3H), 2.36 (s, 3H), 1.09 (t,  $J = 7.2$  Hz, 3H).  $^{13}\text{C NMR}$  (600 MHz,  $\text{CDCl}_3$ ):  $\delta$  167.81, 166.56, 164.60, 159.85, 154.53, 149.84, 142.21, 141.12, 135.41, 134.34, 129.64, 128.79, 128.52, 126.15, 121.51, 111.18, 62.41, 23.04, 21.78, 19.38, 13.96. HRMS ( $\text{ESI}^+$ )  $m/z$ : Calcd for  $\text{C}_{23}\text{H}_{22}\text{N}_3\text{O}_3$  [ $\text{M}+\text{H}$ ] $^+$  388.1656, Found 388.1655.

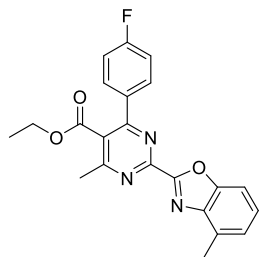

**Ethyl 4-(4-fluorophenyl)-6-methyl-2-(4-methylbenzo[d]oxazol-2-yl)pyrimidine-5-carboxylate (3cb).** Grey solid, m.p. = 137-139 °C.  $^1\text{H NMR}$  (600 MHz,  $\text{CDCl}_3$ ):  $\delta$  7.79-7.77 (m, 2H), 7.69 (s, 1H), 7.57 (d,  $J = 8.4$  Hz, 1H), 7.27 (d,  $J = 9.0$  Hz, 1H), 7.18 (t,  $J = 8.4$  Hz, 2H), 4.26 (q,  $J = 6.6$  Hz, 2H), 2.78 (s, 3H), 2.50 (s, 3H), 1.15 (t,  $J = 7.2$  Hz, 3H);  $^{13}\text{C NMR}$  (151 MHz,  $\text{CDCl}_3$ ):  $\delta$  167.26, 166.65, 165.08, 163.42, 163.26, 159.38, 154.33, 149.59, 141.92, 135.28, 130.74, 128.43, 125.96, 121.30, 115.94, 110.94, 62.30, 22.83, 21.53, 13.73; HRMS ( $\text{ESI}^+$ )  $m/z$ : Calcd for  $\text{C}_{22}\text{H}_{19}\text{FN}_3\text{O}_3$  [ $\text{M}+\text{H}$ ] $^+$  392.1405, Found 392.1407.

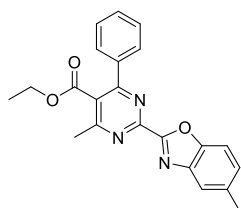

**Ethyl 4-methyl-2-(5-methylbenzo[d]oxazol-2-yl)-6-phenylpyrimidine-5-carboxylate (3ac).** Light yellow oil.  $^1\text{H NMR}$  (400 MHz,  $\text{CDCl}_3$ ):  $\delta$  7.78 – 7.76 (m, 2H), 7.71 (s, 1H), 7.59 (d,  $J = 8.8$  Hz, 1H), 7.51–7.50 (m, 3H), 7.28 (d,  $J = 10.0$  Hz, 1H), 4.25 (q,  $J = 7.2$  Hz, 2H), 2.80 (s, 3H), 2.51 (s, 3H), 1.11 (t,  $J = 7.2$  Hz, 3H);  $^{13}\text{C NMR}$  (100 MHz,  $\text{CDCl}_3$ ):  $\delta$  167.33, 166.54, 164.57, 159.52, 154.33, 149.61, 141.95, 137.02, 135.23, 130.43, 128.68, 128.55, 128.35, 126.15, 121.29, 110.96, 62.20, 22.82, 21.53, 13.63; HRMS (ESI $^+$ )  $m/z$ : Calcd for  $\text{C}_{22}\text{H}_{20}\text{N}_3\text{O}_3$  [M+H] $^+$  374.1499, Found 374.1506.

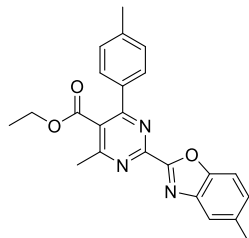

**Ethyl 4-methyl-2-(5-methylbenzo[d]oxazol-2-yl)-6-(p-tolyl)pyrimidine-5-carboxylate (3bc).** Yellow solid, m.p. = 146–148 °C.  $^1\text{H NMR}$  (600 MHz,  $\text{CDCl}_3$ )  $\delta$  7.72 (d,  $J = 12$  Hz, 1H), 7.62 (d,  $J = 12$  Hz, 2H), 7.42 (s, 1H), 7.26 – 7.13 (m, 3H), 4.20 (q,  $J = 10.8$  Hz, 2H), 2.70 (s, 3H), 2.46 (s, 3H), 2.35 (s, 3H), 1.09 (t,  $J = 10.8$  Hz, 3H).  $^{13}\text{C NMR}$  (101 MHz,  $\text{CDCl}_3$ )  $\delta$  167.83, 166.53, 164.58, 159.35, 154.54, 151.89, 141.10, 139.87, 137.95, 134.35, 129.63, 128.79, 126.93, 126.07, 121.16, 111.78, 62.40, 23.04, 22.25, 21.67, 13.96; HRMS (ESI $^+$ )  $m/z$ : Calcd for  $\text{C}_{23}\text{H}_{22}\text{N}_3\text{O}_3$  [M+H] $^+$  388.1656, Found 388.1653.

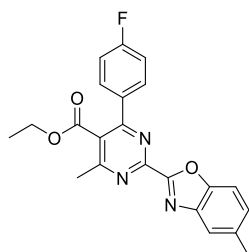

**Ethyl 4-(4-fluorophenyl)-6-methyl-2-(5-methylbenzo[d]oxazol-2-yl)pyrimidine-5-carboxylate (3cc).** Yellow solid, m.p. = 153–155 °C.  $^1\text{H NMR}$  (600 MHz,  $\text{CDCl}_3$ )  $\delta$  7.79 – 7.77 (m, 3H), 7.53 – 7.49 (m, 2H), 7.18 (t,  $J = 8.4$  Hz, 2H), 4.26 (q,  $J = 7.2$  Hz, 2H), 2.78 (s, 3H), 2.52 (s, 3H), 1.15 (t,  $J = 7.2$  Hz, 3H).  $^{13}\text{C NMR}$  (150 MHz,  $\text{CDCl}_3$ )  $\delta$  167.28, 166.63, 163.25, 158.90, 151.65, 137.89, 132.35, 130.87, 130.74, 126.79, 120.97, 115.93, 111.53, 62.30, 22.02, 19.13, 13.73; HRMS (ESI $^+$ )  $m/z$ : Calcd for  $\text{C}_{22}\text{H}_{19}\text{FN}_3\text{O}_3$  [M+H] $^+$  392.1405, Found 392.1407.

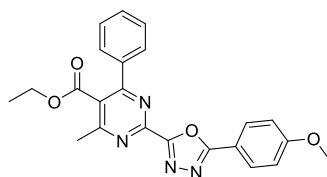

**Ethyl 2-(5-(4-methoxyphenyl)-1,3,4-oxadiazol-2-yl)-4-methyl-6-phenylpyrimidine-5-carboxylate (3ad).** Light yellow oil.  $^1\text{H NMR}$  (600 MHz,  $\text{CDCl}_3$ ):  $\delta$  8.19 (d,  $J = 8.4$  Hz, 2H), 7.77 (d,  $J = 7.8$  Hz, 2H), 7.53 – 7.49 (m, 3H), 7.03 (d,  $J = 9.0$  Hz, 2H), 4.26 (q,  $J = 7.2$  Hz, 2H), 3.89 (s, 3H), 2.77 (s, 3H), 1.12 (t,  $J = 7.2$  Hz, 3H);  $^{13}\text{C NMR}$  (151 MHz,  $\text{CDCl}_3$ ):  $\delta$  167.23, 166.71, 164.36, 162.78, 152.47, 136.75, 130.65, 129.43, 128.69, 128.61, 126.20, 115.89, 114.76, 114.49, 62.27, 55.48, 22.74, 13.64; HRMS (ESI $^+$ )  $m/z$ : Calcd for  $\text{C}_{23}\text{H}_{21}\text{N}_4\text{O}_4$  [M+H] $^+$  417.1557, Found 417.1552.

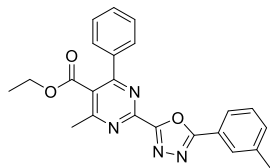

**Ethyl 4-methyl-6-phenyl-2-(5-(m-tolyl)-1,3,4-oxadiazol-2-yl)pyrimidine-5-carboxylate (3ae).**

Yellow solid, m.p. = 151-152 °C. <sup>1</sup>H NMR (600 MHz, CDCl<sub>3</sub>): δ 8.08 (s, 1H), 8.04 (d, *J* = 7.8 Hz, 1H), 7.78 (d, *J* = 7.2 Hz, 2H), 7.54-7.50 (m, 3H), 7.43 (t, *J* = 7.8 Hz, 1H), 7.39 (d, *J* = 7.2 Hz, 1H), 4.26 (q, *J* = 7.2 Hz, 2H), 2.78 (s, 3H), 2.46 (s, 3H), 1.12 (t, *J* = 7.2 Hz, 3H); <sup>13</sup>C NMR (151 MHz, CDCl<sub>3</sub>): δ 167.14, 166.76, 166.32, 164.41, 152.39, 138.99, 136.72, 133.09, 130.68, 128.94, 128.71, 128.61, 128.05, 124.75, 123.10, 114.95, 62.30, 22.75, 21.28, 13.64; HRMS (ESI<sup>+</sup>) *m/z*: Calcd for C<sub>23</sub>H<sub>21</sub>N<sub>4</sub>O<sub>3</sub> [M+H]<sup>+</sup> 401.1608, Found 401.1611.

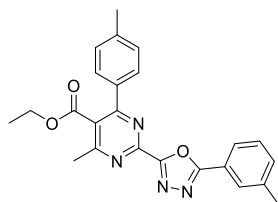

**Ethyl 4-methyl-6-(p-tolyl)-2-(5-(m-tolyl)-1,3,4-oxadiazol-2-yl)pyrimidine-5-carboxylate (3be).**

<sup>1</sup>H NMR (600 MHz, CDCl<sub>3</sub>): δ 8.08 (s, 1H), 8.04 (d, *J* = 7.2 Hz, 1H), 7.70 (d, *J* = 8.4 Hz, 2H), 7.42 (d, *J* = 7.8 Hz, 1H), 7.39 (d, *J* = 7.2 Hz, 1H), 7.31 (d, *J* = 7.8 Hz, 2H), 4.29 (q, *J* = 7.2 Hz, 2H), 2.76 (s, 3H), 2.46 (s, 3H), 2.44 (s, 3H), 1.17 (t, *J* = 7.2 Hz, 3H); <sup>13</sup>C NMR (150 MHz, CDCl<sub>3</sub>): δ 167.10, 166.38, 164.33, 162.58, 152.38, 141.19, 139.09, 139.03, 133.05, 131.04, 129.44, 128.93, 128.62, 128.03, 124.73, 123.26, 62.26, 22.71, 21.45, 21.27, 13.72; HRMS (ESI<sup>+</sup>) *m/z*: Calcd for C<sub>24</sub>H<sub>23</sub>N<sub>4</sub>O<sub>3</sub> [M+H]<sup>+</sup> 415.1765, Found 415.1761.

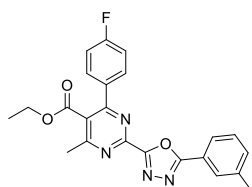

**Ethyl 4-(4-fluorophenyl)-6-methyl-2-(5-(m-tolyl)-1,3,4-oxadiazol-2-yl)pyrimidine-5-carboxylate (3ce).**

<sup>1</sup>H NMR (600 MHz, CDCl<sub>3</sub>) δ 8.07 (s, 1H), 8.03 (d, *J* = 7.2 Hz, 1H), 7.81-7.79 (m, 2H), 7.44 – 7.38 (m, 2H), 7.19 (t, *J* = 8.4 Hz, 2H), 4.29 (q, *J* = 7.2 Hz, 2H), 2.77 (s, 3H), 2.45 (s, 3H), 1.17 (t, *J* = 7.8 Hz, 3H). <sup>13</sup>C NMR (151 MHz, CDCl<sub>3</sub>); δ 167.64, 166.86, 166.40, 165.21, 163.54, 162.42, 152.40, 139.00, 133.13, 130.88, 130.83, 128.95, 128.02, 126.15, 124.73, 123.22, 62.40, 22.74, 21.27, 13.74. HRMS (ESI<sup>+</sup>) *m/z*: Calcd for C<sub>23</sub>H<sub>20</sub>FN<sub>4</sub>O<sub>3</sub> [M+H]<sup>+</sup> 415.1765, Found 419.1514.

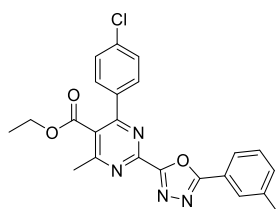

**Ethyl 4-(4-chlorophenyl)-6-methyl-2-(5-(m-tolyl)-1,3,4-oxadiazol-2-yl)pyrimidine-5-carboxylate (3de).**

Yellow solid, m.p. = 131-132 °C. <sup>1</sup>H NMR (600 MHz, CDCl<sub>3</sub>): δ 8.07 (s, 1H), 8.04 (d, *J* = 7.2 Hz, 1H), 7.74 (d, *J* = 8.4 Hz, 2H), 7.49 (d, *J* = 8.4 Hz, 2H), 7.45 – 7.39 (m, 2H), 4.30 (q, *J* = 7.1 Hz, 2H),



2.78 (s, 3H), 2.46 (s, 3H), 1.19 (t,  $J = 7.2$  Hz, 3H);  $^{13}\text{C}$  NMR (150 MHz,  $\text{CDCl}_3$ ):  $\delta$  166.99, 166.34, 163.06, 162.37, 152.47, 139.02, 137.21, 135.07, 133.15, 130.03, 129.02, 128.97, 128.03, 126.18, 124.74, 123.21, 62.47, 22.77, 21.28, 13.75; HRMS (ESI<sup>+</sup>)  $m/z$ : Calcd for  $\text{C}_{23}\text{H}_{20}\text{ClN}_4\text{O}_3$   $[\text{M}+\text{H}]^+$  435.1218, Found 435.1213.

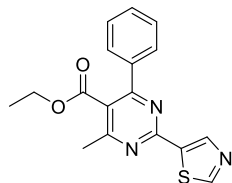

**Ethyl 4-methyl-6-phenyl-2-(thiazol-2-yl)pyrimidine-5-carboxylate (3af).** Yellow solid, m.p. = 126-128 °C.  $^1\text{H}$  NMR (600 MHz,  $\text{CDCl}_3$ ):  $\delta$  8.90 (s, 1H), 8.79 (s, 1H), 7.70 (d,  $J = 6.6$  Hz, 2H), 7.50 – 7.46 (m, 3H), 4.20 (q,  $J = 7.2$  Hz, 2H), 2.65 (s, 3H), 1.07 (t,  $J = 7.2$  Hz, 3H).  $^{13}\text{C}$  NMR (150 MHz,  $\text{CDCl}_3$ ):  $\delta$  167.87, 165.88, 163.81, 159.31, 156.51, 145.41, 137.44, 130.26, 128.54, 128.39, 123.57, 61.91, 22.66, 13.62. HRMS (ESI<sup>+</sup>)  $m/z$ : Calcd for  $\text{C}_{17}\text{H}_{16}\text{N}_3\text{O}_2\text{S}$   $[\text{M}+\text{H}]^+$  326.0958, Found 326.0960.

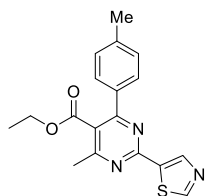

**Ethyl 4-methyl-2-(thiazol-2-yl)-6-(p-tolyl)pyrimidine-5-carboxylate (3bf).** Yellow solid, m.p. = 126-128 °C.  $^1\text{H}$  NMR (600 MHz,  $\text{CDCl}_3$ ):  $\delta$  8.90 (s, 1H), 8.79 (s, 1H), 7.63 (d,  $J = 7.8$  Hz, 2H), 7.28 (d,  $J = 8.4$  Hz, 2H), 4.23 (q,  $J = 7.2$  Hz, 2H), 2.63 (s, 3H), 2.42 (s, 3H), 1.13 (t,  $J = 7.2$  Hz, 3H).  $^{13}\text{C}$  NMR (150 MHz,  $\text{CDCl}_3$ ):  $\delta$  168.09, 165.66, 163.61, 159.24, 156.41, 145.31, 140.67, 138.68, 134.54, 129.27, 128.38, 123.38, 61.88, 22.62, 21.40, 13.71. HRMS (ESI<sup>+</sup>)  $m/z$ : Calcd for  $\text{C}_{18}\text{H}_{18}\text{N}_3\text{O}_2\text{S}$   $[\text{M}+\text{H}]^+$  340.1114, Found 340.1112.

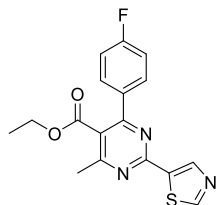

**Ethyl 4-(4-fluorophenyl)-6-methyl-2-(thiazol-2-yl)pyrimidine-5-carboxylate (3cf).** Light yellow oil.  $^1\text{H}$  NMR (600 MHz,  $\text{CDCl}_3$ ):  $\delta$  8.92 (s, 1H), 8.79 (s, 1H), 7.73 (t,  $J = 8.4$  Hz, 2H), 7.17 (t,  $J = 6.6$  Hz, 2H), 4.24 (q,  $J = 7.2$  Hz, 2H), 2.65 (s, 3H), 1.14 (t,  $J = 7.2$  Hz, 3H).  $^{13}\text{C}$  NMR (150 MHz,  $\text{CDCl}_3$ ):  $\delta$  167.81, 166.01, 162.53, 159.29, 156.60, 145.39, 130.59, 130.53, 123.42, 115.77, 115.62, 109.99, 62.01, 22.66, 13.73. HRMS (ESI<sup>+</sup>)  $m/z$ : Calcd for  $\text{C}_{17}\text{H}_{15}\text{FN}_3\text{O}_2\text{S}$   $[\text{M}+\text{H}]^+$  344.0864, Found 344.0864.

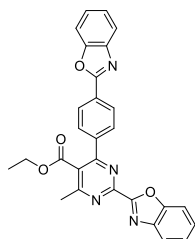

**Ethyl 2-(benzo[d]oxazol-2-yl)-4-(4-(benzo[d]oxazol-2-yl)phenyl)-6-methylpyrimidine-5-carboxylate (3ja).** Yellow solid, m.p. = 225-226 °C.  $^1\text{H}$  NMR (600 MHz, Chloroform-*d*)  $\delta$  8.40 (d,  $J =$

7.8 Hz, 2H), 7.96 (d,  $J = 7.8$  Hz, 3H), 7.82 (d,  $J = 5.4$  Hz, 1H), 7.74 (d,  $J = 8.4$  Hz, 1H), 7.63 (d,  $J = 5.4$  Hz, 1H), 7.50 – 7.39 (m, 4H), 4.28 (q,  $J = 6.6$  Hz, 2H), 2.83 (s, 3H), 1.15 (t,  $J = 7.2$  Hz, 3H).  $^{13}\text{C}$  NMR (151 MHz, Chloroform-*d*)  $\delta$  167.02, 163.52, 162.06, 159.29, 154.39, 151.34, 150.86, 142.03, 141.71, 139.68, 129.23, 128.99, 127.83, 127.14, 126.25, 125.60, 125.35, 124.84, 121.70, 120.24, 111.63, 110.72, 109.99, 62.46, 22.91, 13.73. HRMS (ESI<sup>+</sup>)  $m/z$ : Calcd for  $\text{C}_{28}\text{H}_{21}\text{N}_4\text{O}_4$  [M+H]<sup>+</sup> 477.1557, Found 477.1559.

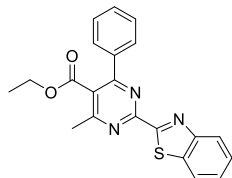

**Ethyl 2-(benzo[d]thiazol-2-yl)-4-methyl-6-phenylpyrimidine-5-carboxylate (5aa).** Yellow solid, m.p. = 149-150 °C  $^1\text{H}$  NMR (600 MHz,  $\text{CDCl}_3$ ):  $\delta$  8.29 (d,  $J = 8.4$  Hz, 1H), 7.95 (d,  $J = 7.8$  Hz, 1H), 7.78 (d,  $J = 9.6$  Hz, 2H), 7.54 – 7.45 (m, 5H), 4.24 (q,  $J = 7.2$  Hz, 2H), 2.78 (s, 3H), 1.10 (t,  $J = 7.2$  Hz, 3H).  $^{13}\text{C}$  NMR (150 MHz,  $\text{CDCl}_3$ ):  $\delta$  167.56, 166.63, 164.01, 158.77, 154.43, 136.98, 136.86, 130.48, 128.61, 128.58, 126.54, 126.53, 125.60, 125.08, 121.82, 62.12, 22.83, 13.64. HRMS (ESI<sup>+</sup>)  $m/z$ : Calcd for  $\text{C}_{17}\text{H}_{14}\text{FN}_3\text{O}_2\text{S}$  [M+H]<sup>+</sup> 343.0791, Found 343.0794. HRMS (ESI<sup>+</sup>)  $m/z$ : Calcd for  $\text{C}_{21}\text{H}_{18}\text{N}_3\text{O}_2\text{S}$  [M+H]<sup>+</sup> 376.1114, Found 376.112

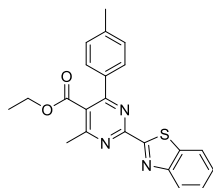

**Ethyl 2-(benzo[d]thiazol-2-yl)-4-methyl-6-(p-tolyl)pyrimidine-5-carboxylate (5ba).** Light yellow oil.  $^1\text{H}$  NMR (600 MHz,  $\text{CDCl}_3$ )  $\delta$  8.29 (d,  $J = 8.4$  Hz, 1H), 7.96 (d,  $J = 7.8$  Hz, 1H), 7.71 (d,  $J = 7.8$  Hz, 2H), 7.53 (t,  $J = 7.2$  Hz, 1H), 7.47 (t,  $J = 7.8$  Hz, 1H), 7.30 (d,  $J = 8.4$  Hz, 2H), 4.27 (q,  $J = 6.6$  Hz, 2H), 2.77 (s, 3H), 2.43 (s, 3H), 1.17 (t,  $J = 7.2$  Hz, 3H).  $^{13}\text{C}$  NMR (151 MHz,  $\text{CDCl}_3$ )  $\delta$  167.81, 166.80, 166.46, 163.77, 158.70, 154.44, 140.96, 136.86, 134.04, 129.36, 128.57, 126.51, 126.48, 125.35, 125.06, 121.82, 62.12, 22.82, 21.45, 13.73. HRMS (ESI<sup>+</sup>)  $m/z$ : Calcd for  $\text{C}_{17}\text{H}_{14}\text{FN}_3\text{O}_2\text{S}$  [M+H]<sup>+</sup> 343.0791, Found 343.0794. HRMS (ESI<sup>+</sup>)  $m/z$ : Calcd for  $\text{C}_{20}\text{H}_{22}\text{N}_3\text{O}_2\text{S}$  [M+H]<sup>+</sup> 379.1271, Found 390.1273.

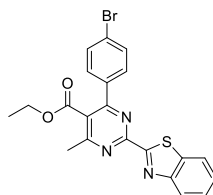

**Ethyl 2-(benzo[d]thiazol-2-yl)-4-(4-bromophenyl)-6-methylpyrimidine-5-carboxylate (5da).** Yellow solid, m.p. = 129-131 °C  $^1\text{H}$  NMR (600 MHz,  $\text{CDCl}_3$ )  $\delta$  8.29 (d,  $J = 8.4$  Hz, 1H), 7.97 (d,  $J = 7.8$  Hz, 1H), 7.67 (d,  $J = 8.4$  Hz, 2H), 7.64 (d,  $J = 9.0$  Hz, 2H), 7.54 (t,  $J = 7.2$  Hz, 1H), 7.48 (t,  $J = 6.6$  Hz, 1H), 4.28 (q,  $J = 7.2$  Hz, 2H), 2.78 (s, 3H), 1.18 (t,  $J = 7.2$  Hz, 3H).  $^{13}\text{C}$  NMR (151 MHz,  $\text{CDCl}_3$ )  $\delta$  167.36, 166.91, 166.35, 162.79, 158.85, 154.42, 136.84, 135.83, 131.89, 130.18, 126.64, 126.62, 125.41, 125.33, 125.12, 121.84, 62.32, 22.87, 13.75. HRMS (ESI<sup>+</sup>)  $m/z$ : Calcd for  $\text{C}_{17}\text{H}_{14}\text{FN}_3\text{O}_2\text{S}$  [M+H]<sup>+</sup> 343.0791, Found 343.0794. HRMS (ESI<sup>+</sup>)  $m/z$ : Calcd for  $\text{C}_{21}\text{H}_{17}\text{BrN}_3\text{O}_2\text{S}$  [M+H]<sup>+</sup> 454.0219, Found 454.0218

### 3 Copies of the NMR Spectra for All Products.

$^1\text{H}$  and  $^{13}\text{C}$  Spectra of compound 3aa ( $\text{CDCl}_3$ , 600 MHz)

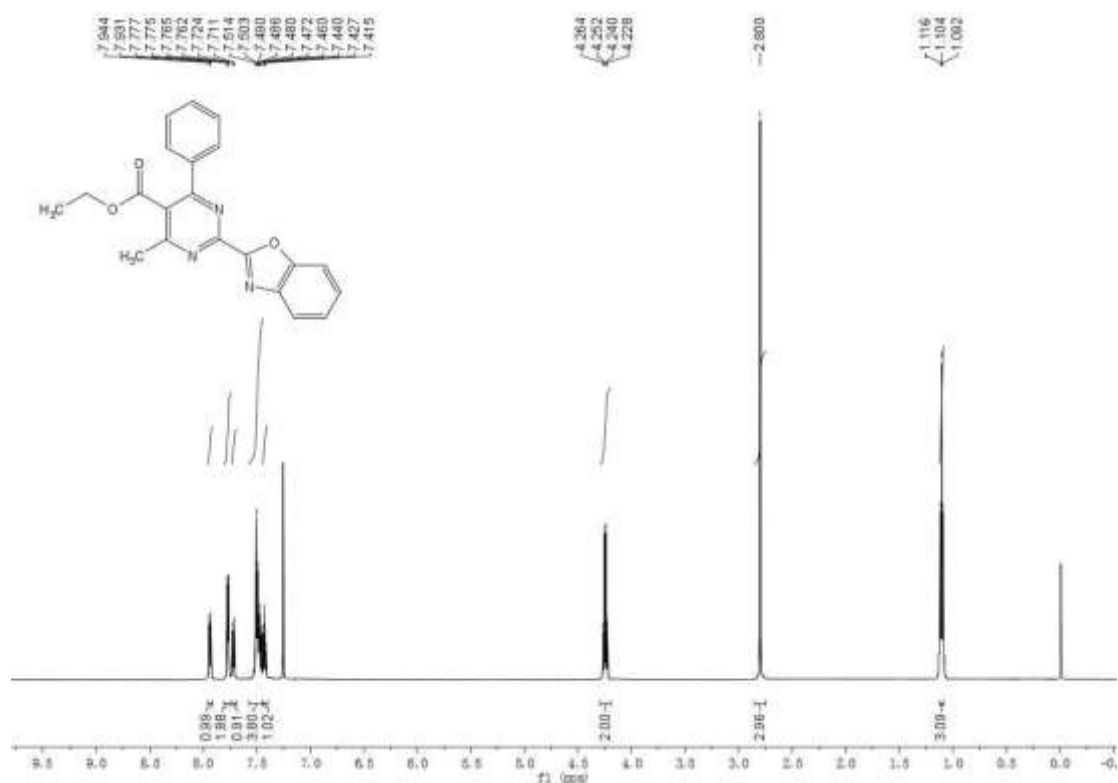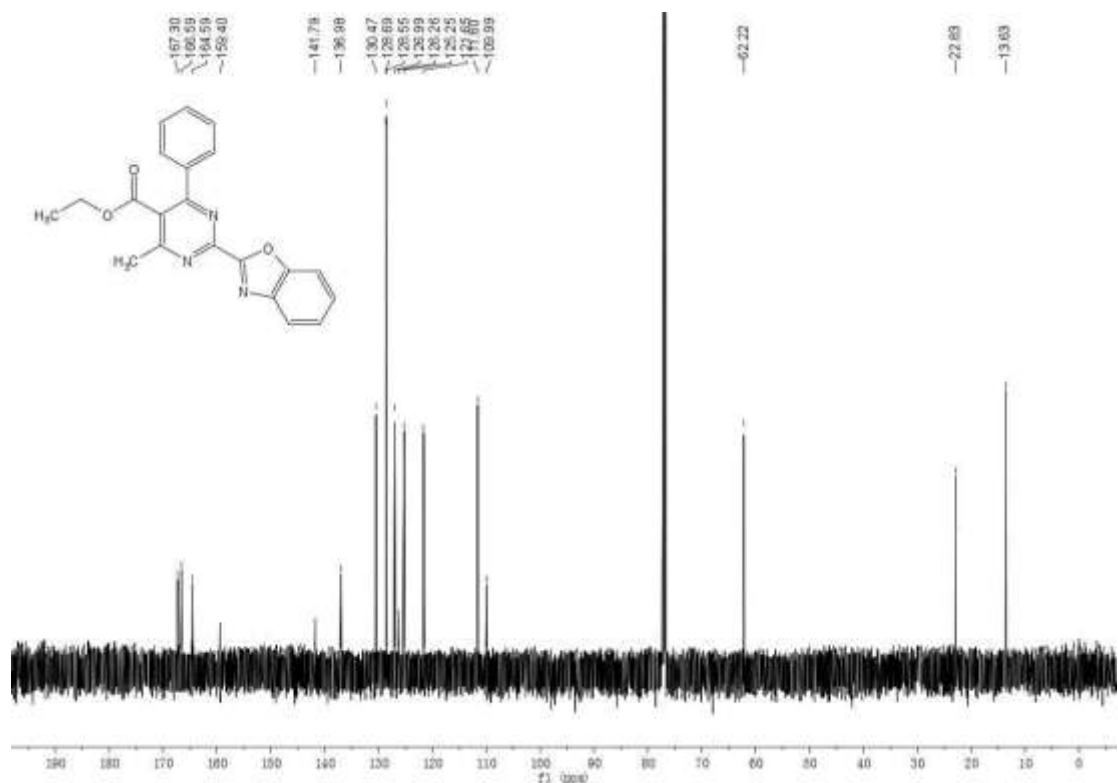

**<sup>1</sup>H and <sup>13</sup>C Spectra of compound 3ba (CDCl<sub>3</sub>, 600 MHz)**

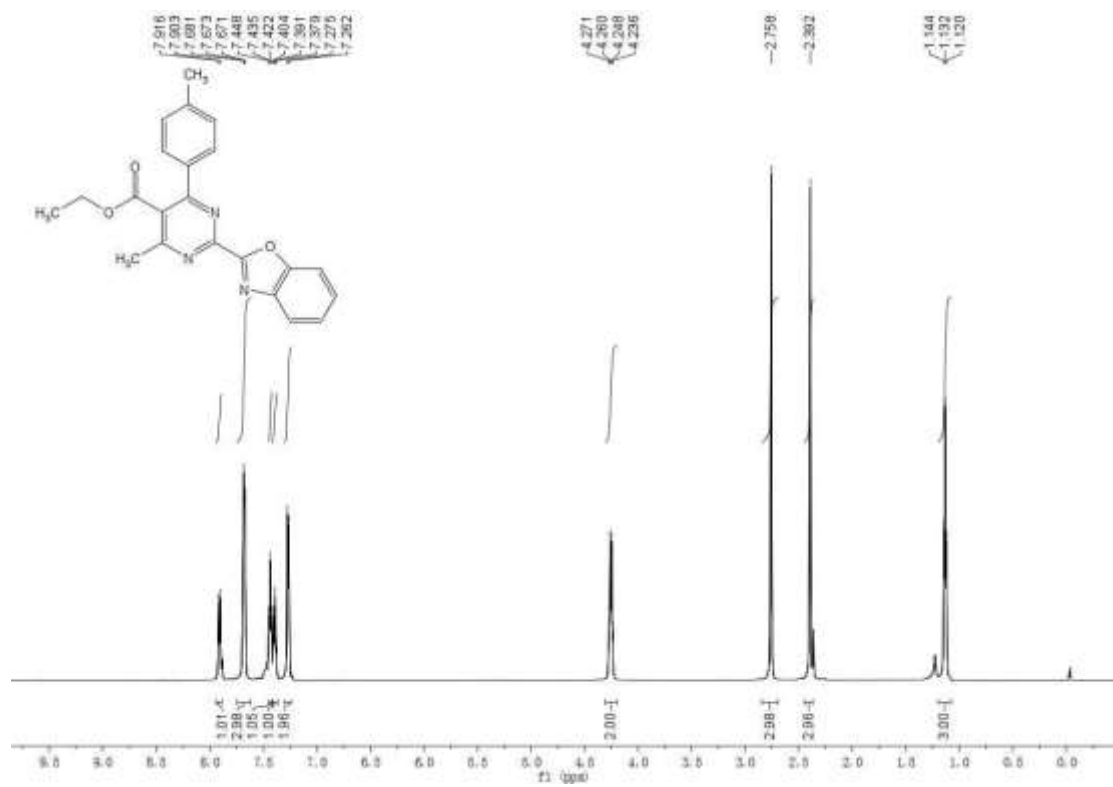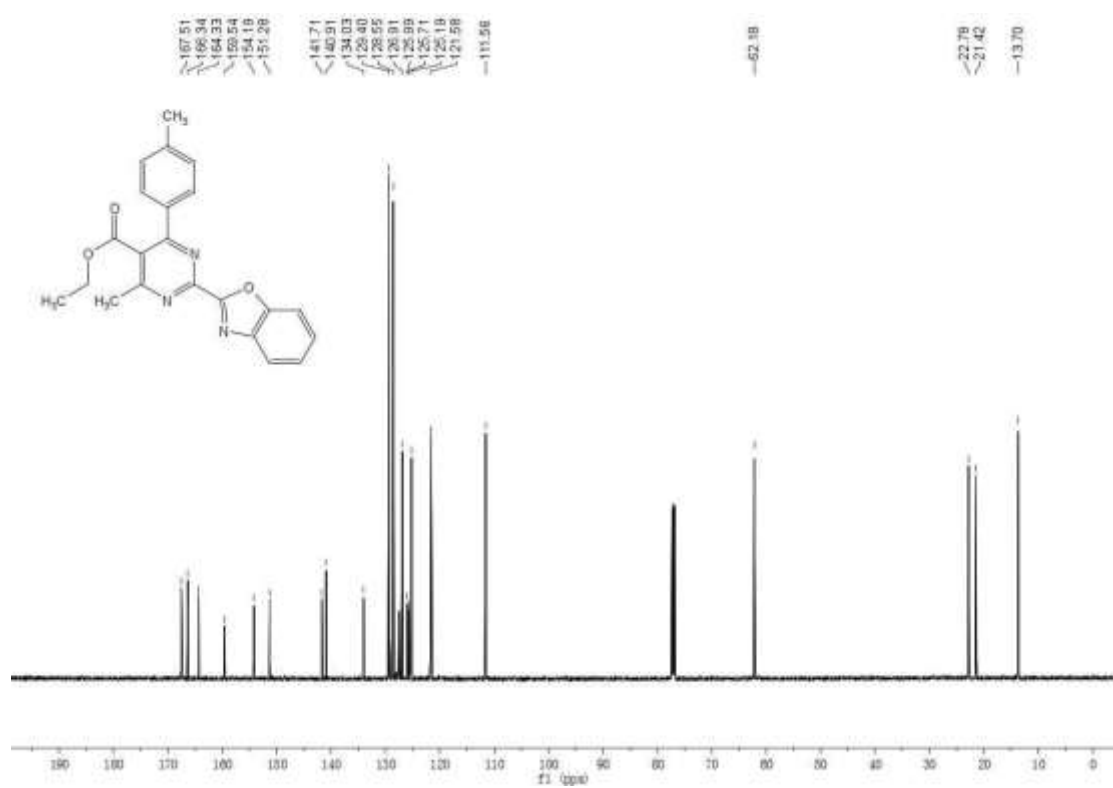

**$^1\text{H}$  and  $^{13}\text{C}$  Spectra of compound 3ca ( $\text{CDCl}_3$ , 600 MHz)**

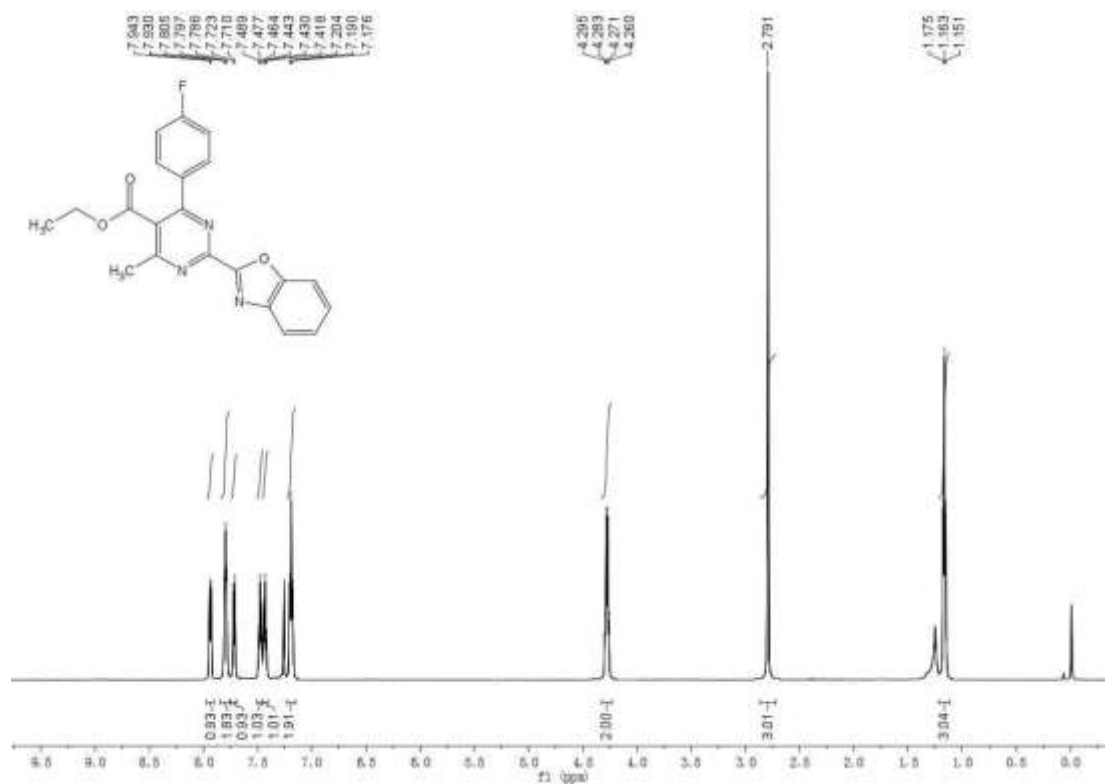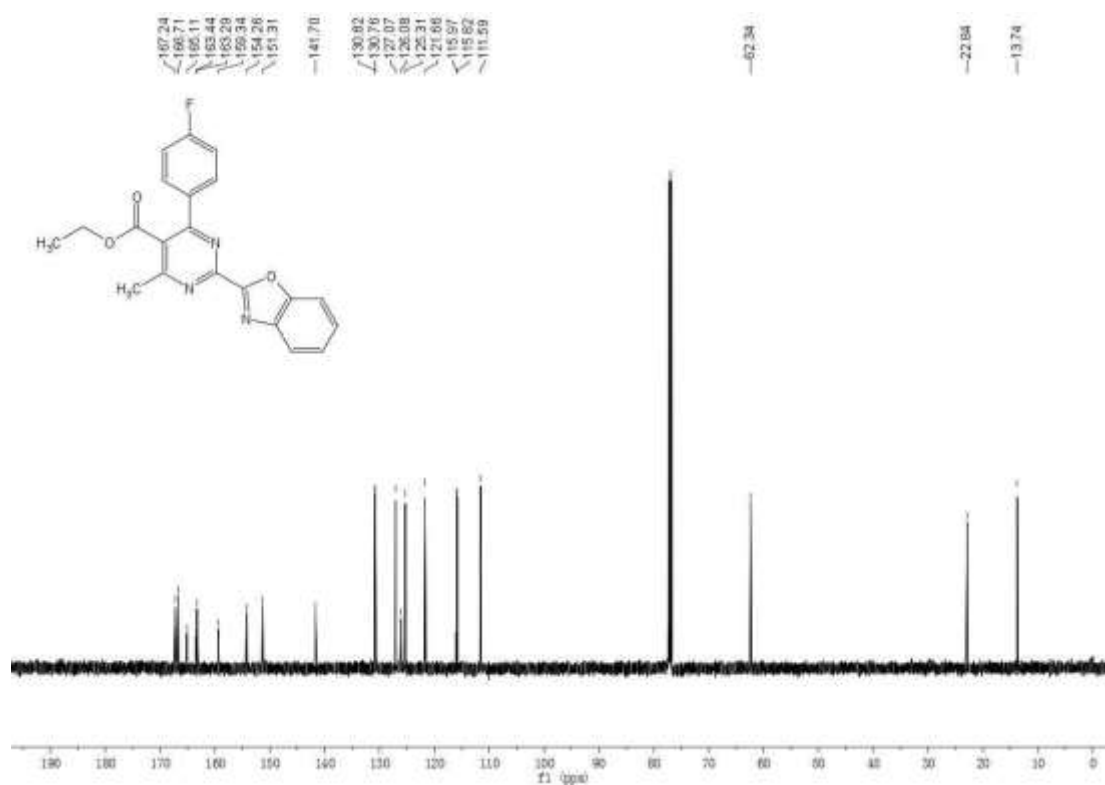

**<sup>1</sup>H and <sup>13</sup>C Spectra of compound 3da (CDCl<sub>3</sub>, 600 MHz)**

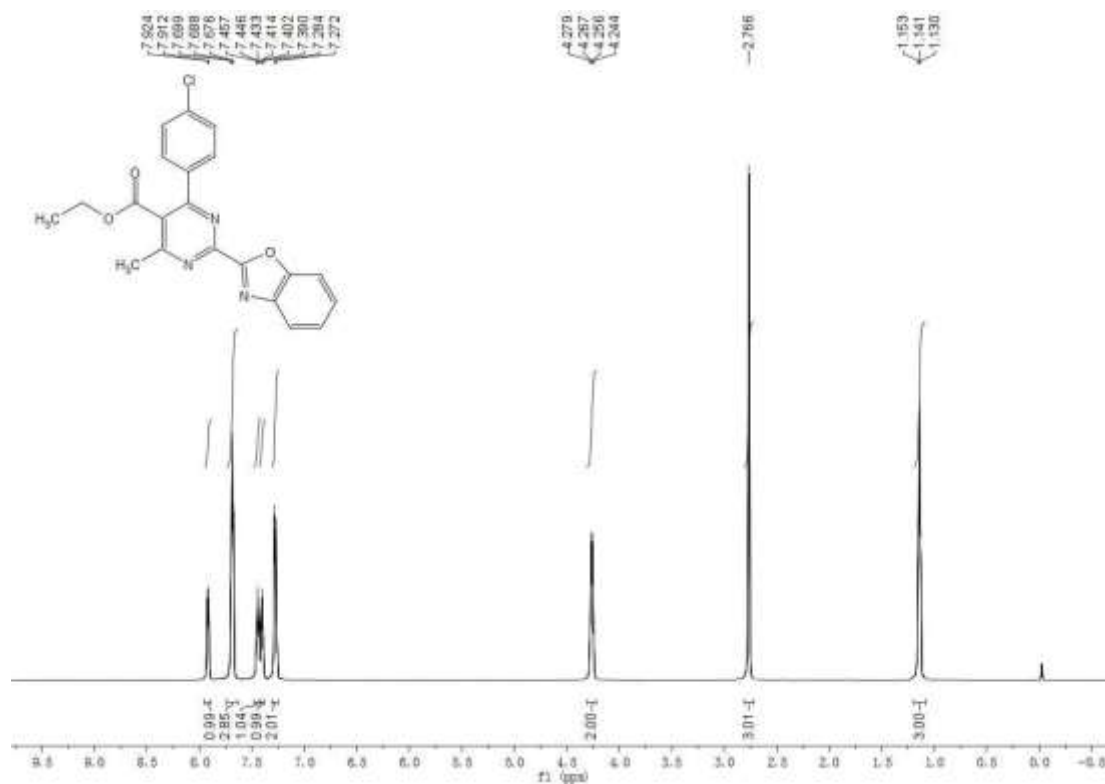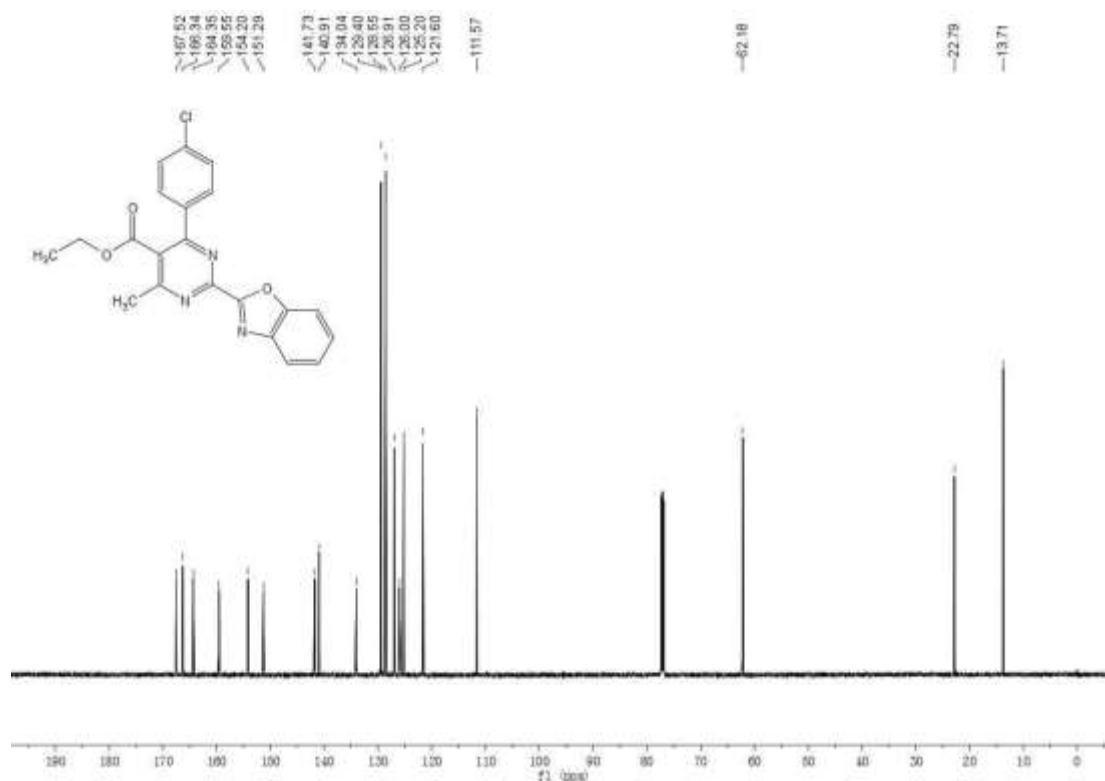

<sup>1</sup>H and <sup>13</sup>C Spectra of compound 3ea (CDCl<sub>3</sub>, 600 MHz)

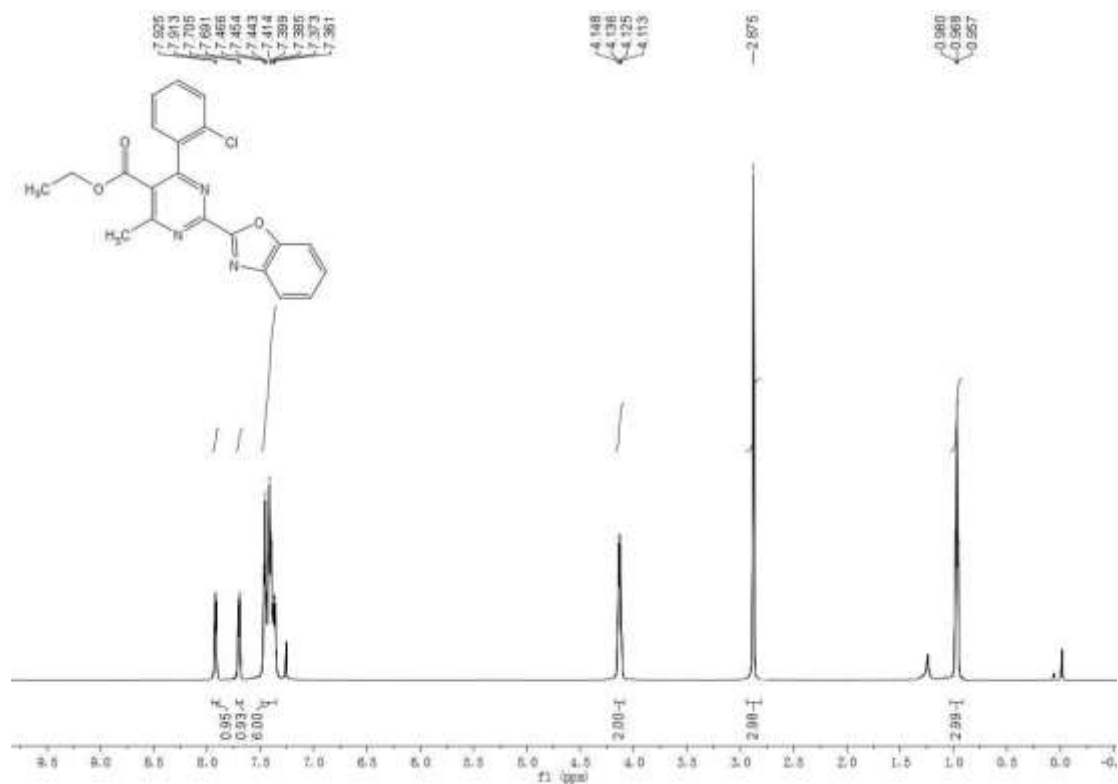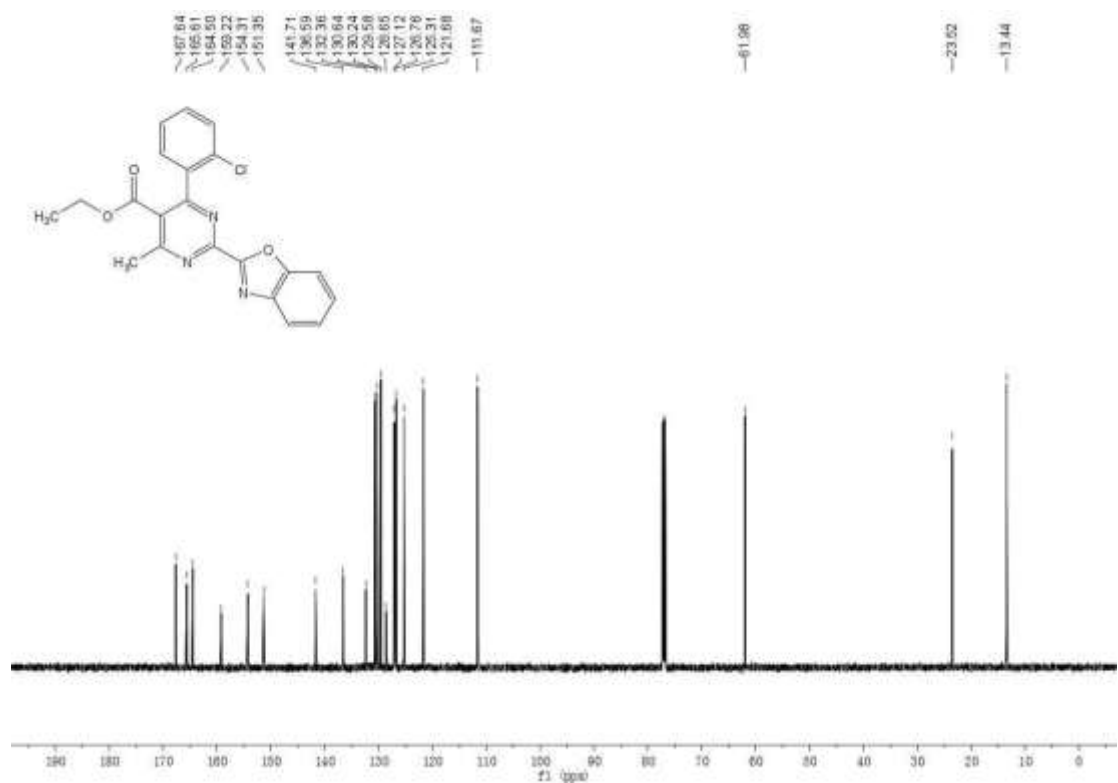

**<sup>1</sup>H and <sup>13</sup>C Spectra of compound 3fa (CDCl<sub>3</sub>, 600 MHz)**

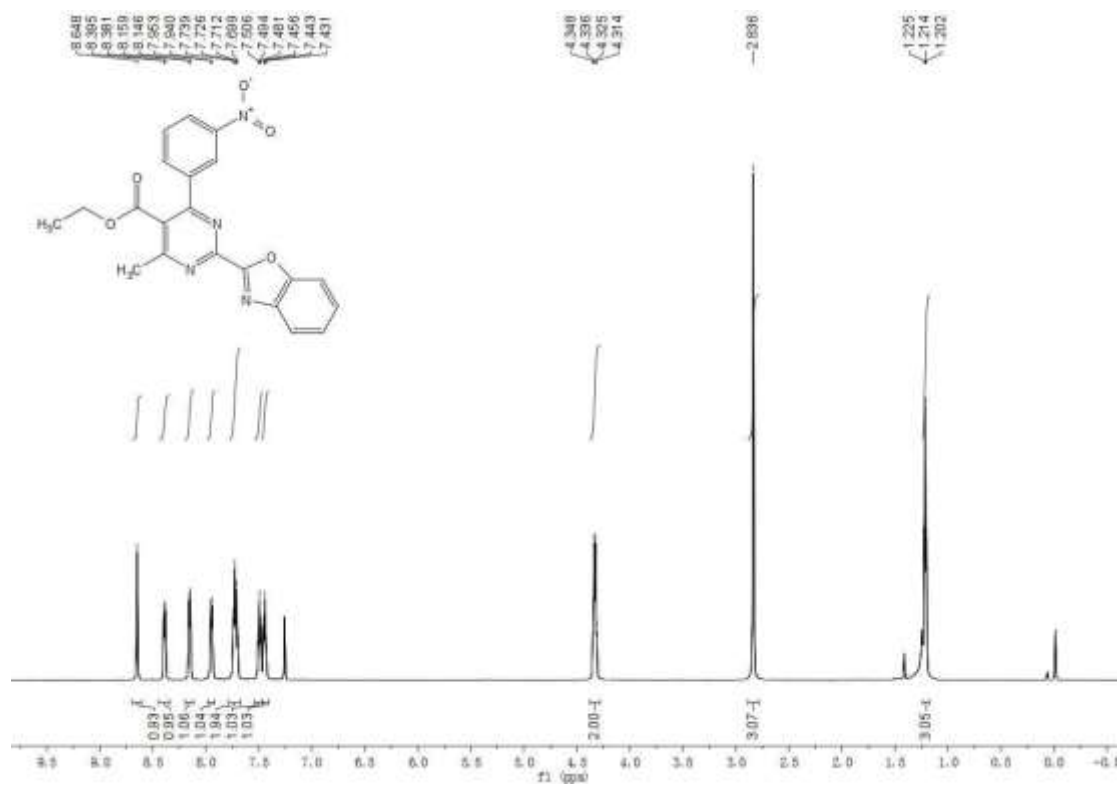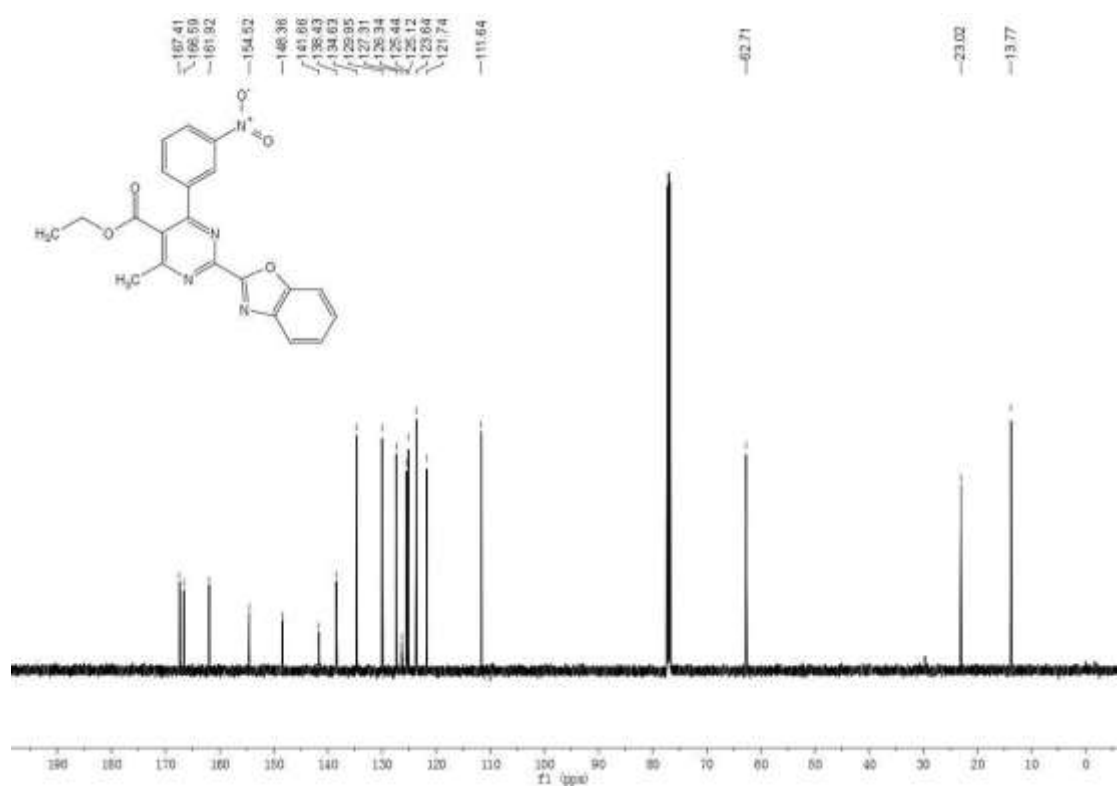



**$^1\text{H}$  and  $^{13}\text{C}$  Spectra of compound 3ga (CDCl<sub>3</sub>, 600 MHz)**

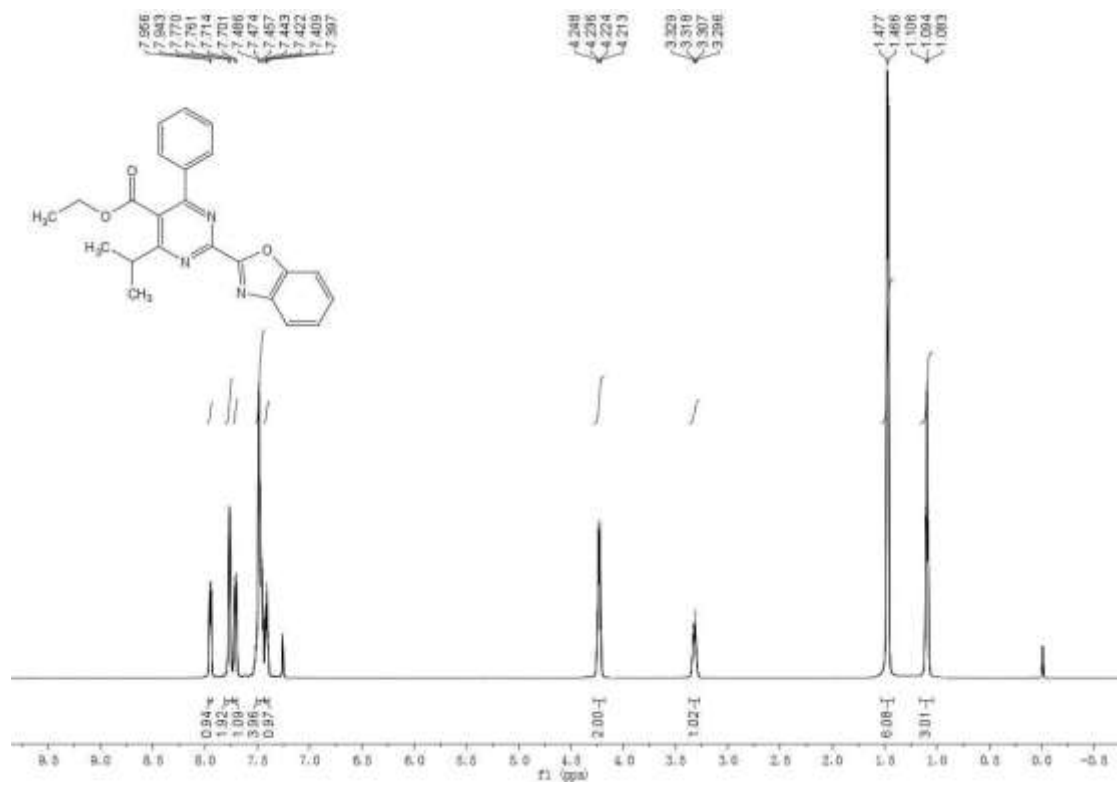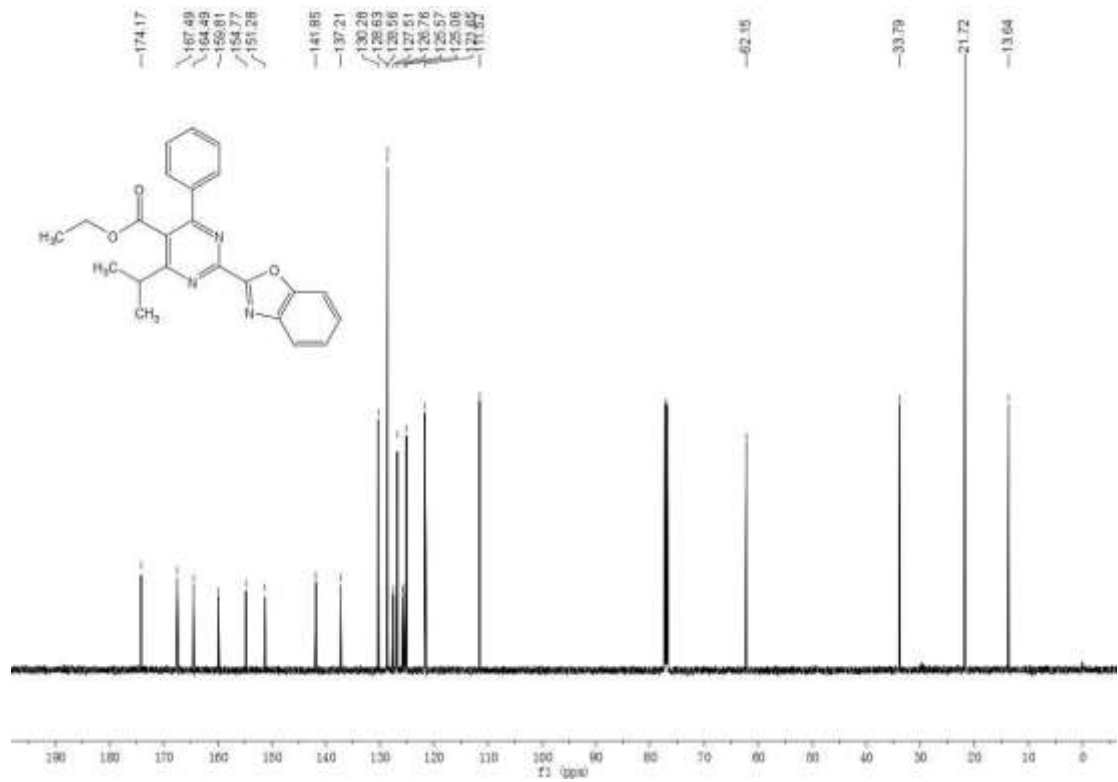

<sup>1</sup>H and <sup>13</sup>C Spectra of compound 3ha (CDCl<sub>3</sub>, 600 MHz)

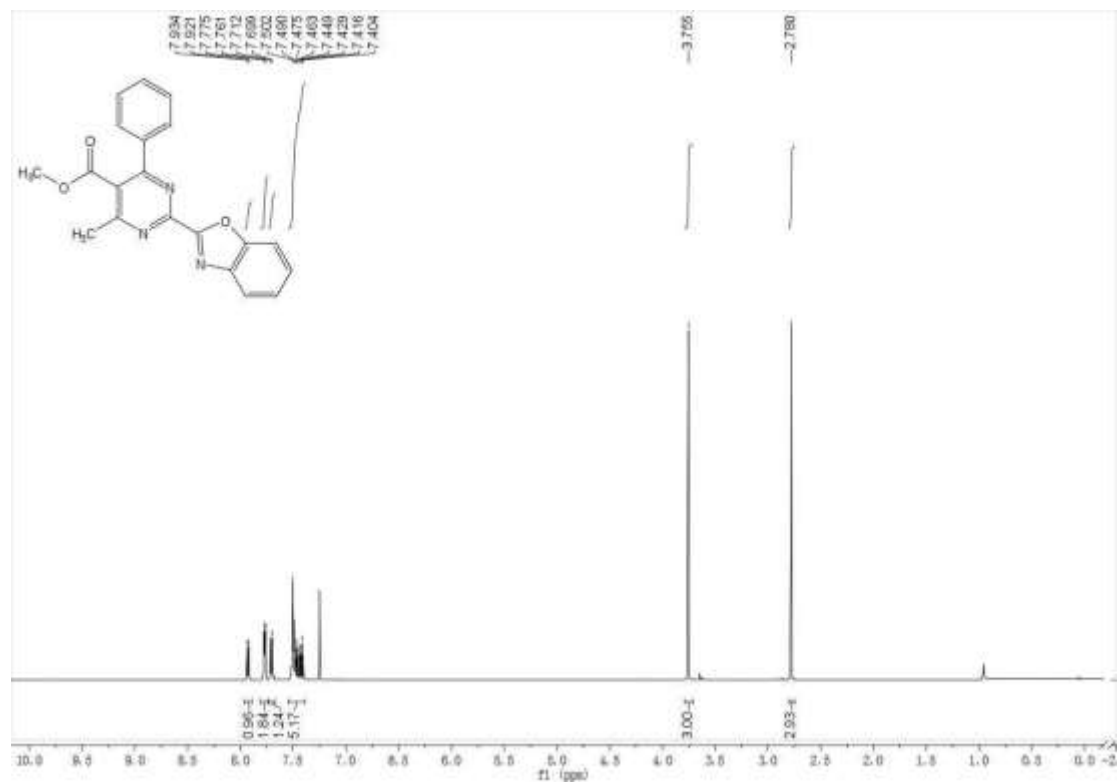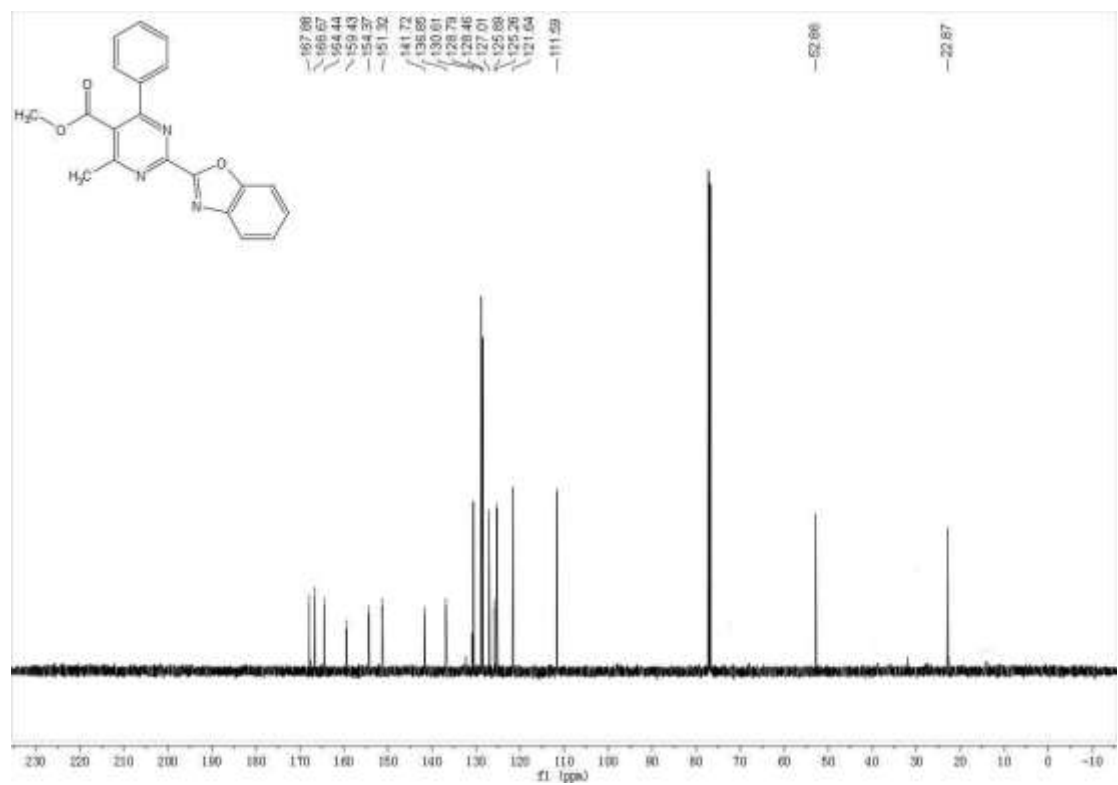

**<sup>1</sup>H and <sup>13</sup>C Spectra of compound 3hb (CDCl<sub>3</sub>, 600 MHz)**

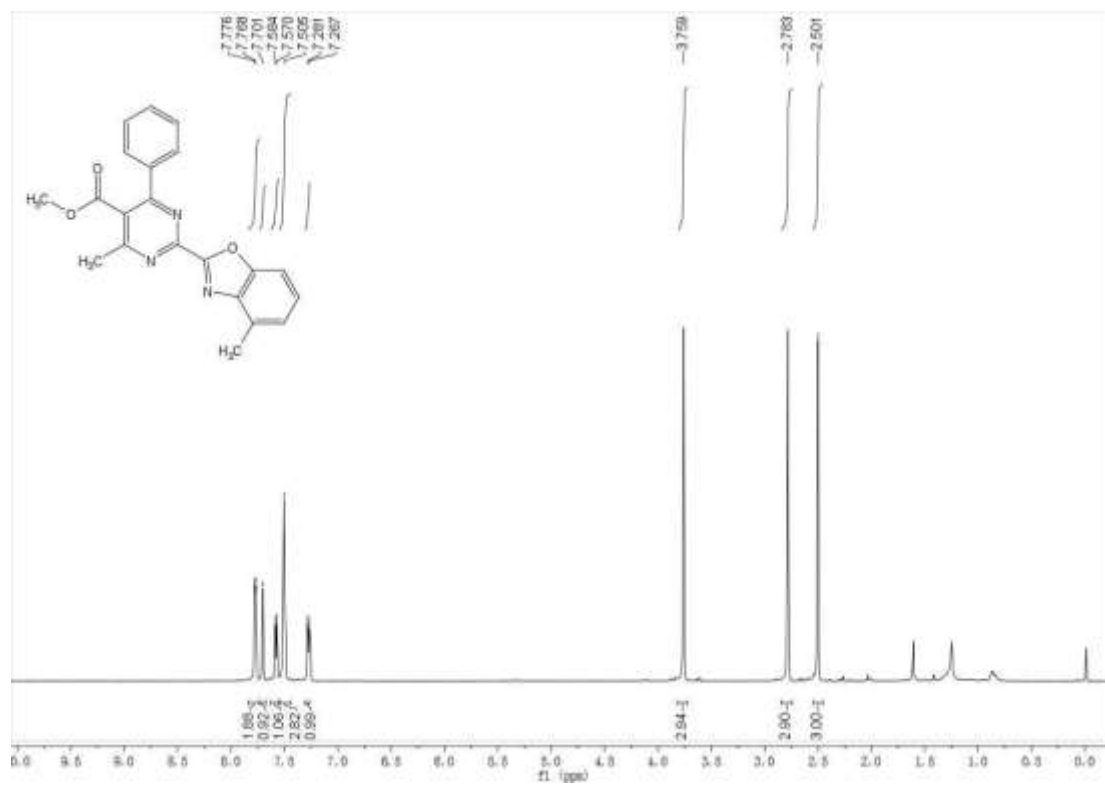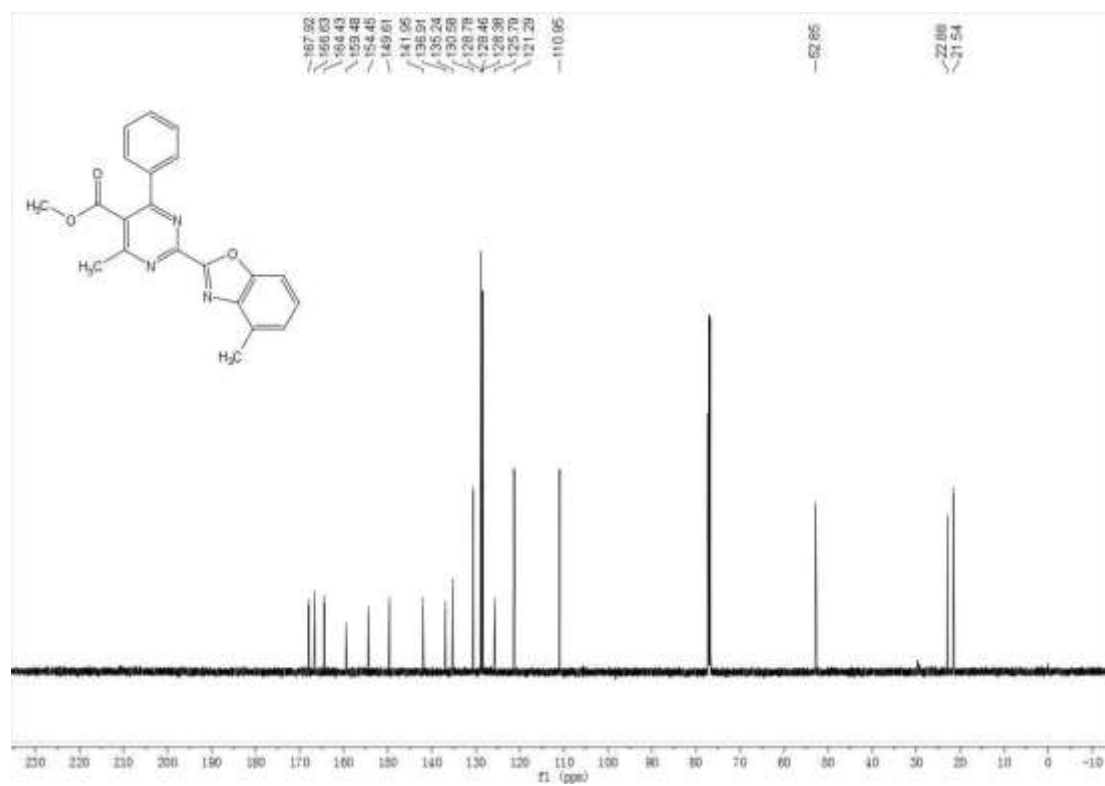

<sup>1</sup>H and <sup>13</sup>C Spectra of compound 3ab (CDCl<sub>3</sub>, 600 MHz)

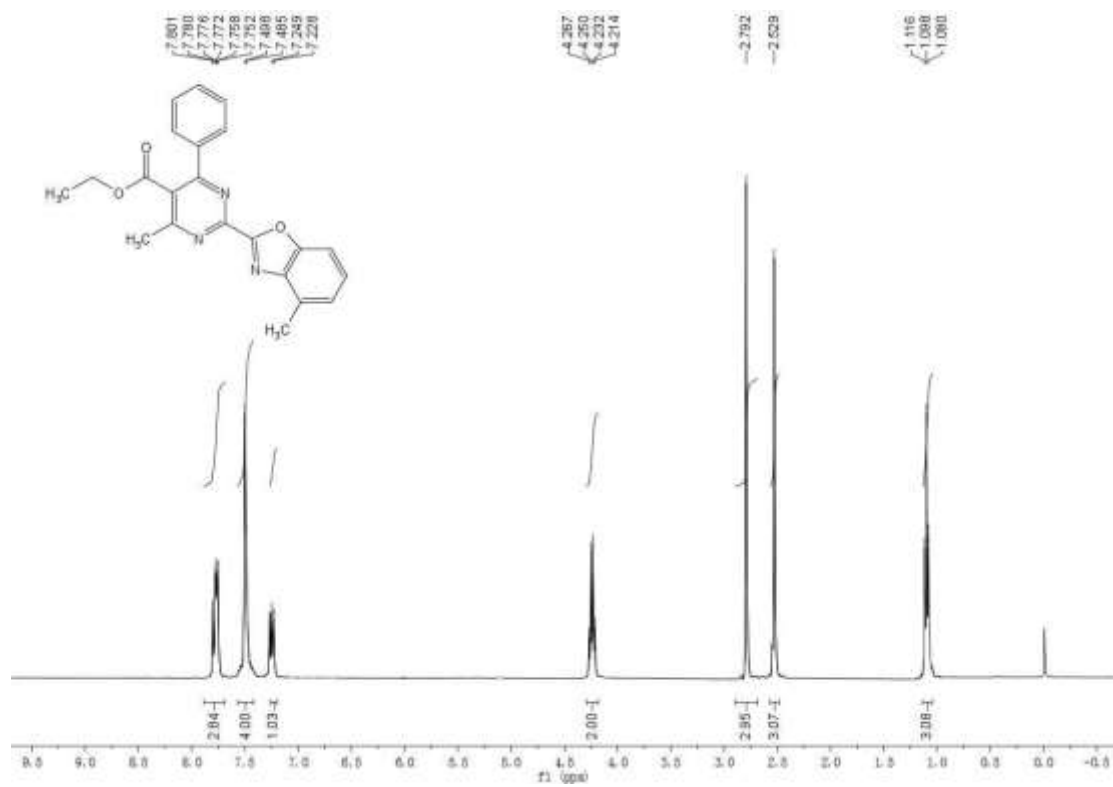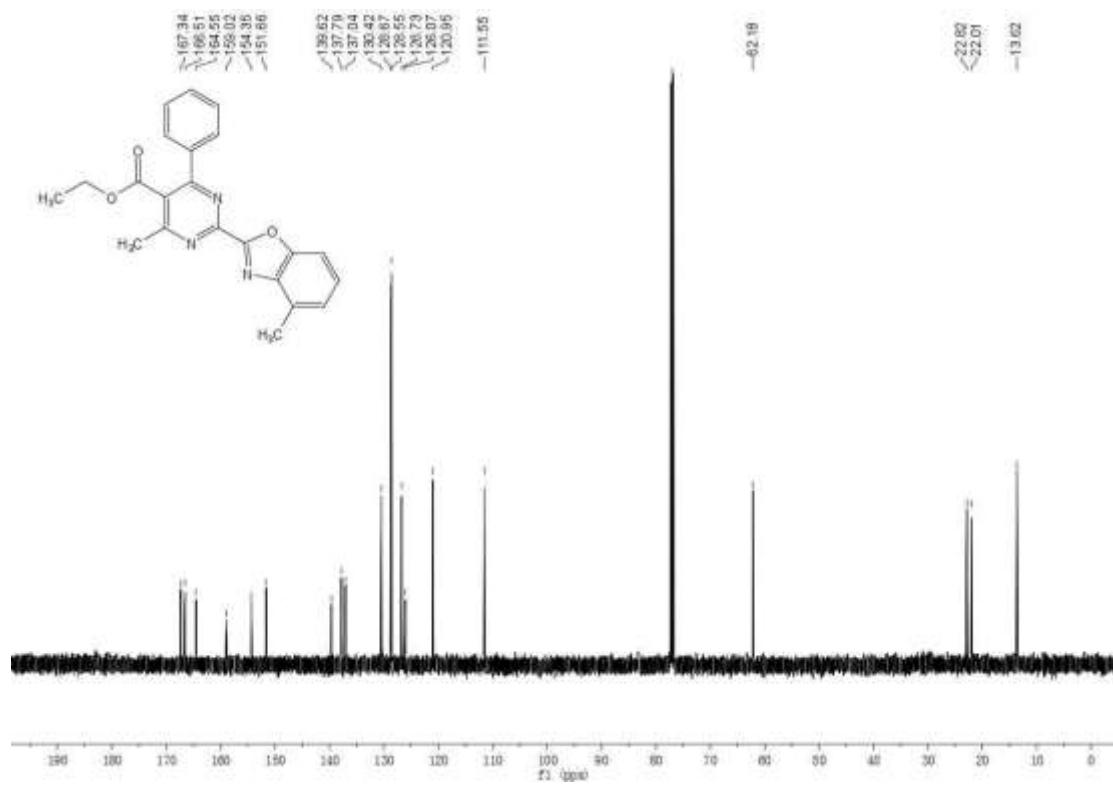

<sup>1</sup>H and <sup>13</sup>C Spectra of compound 3bb (CDCl<sub>3</sub>, 600 MHz)

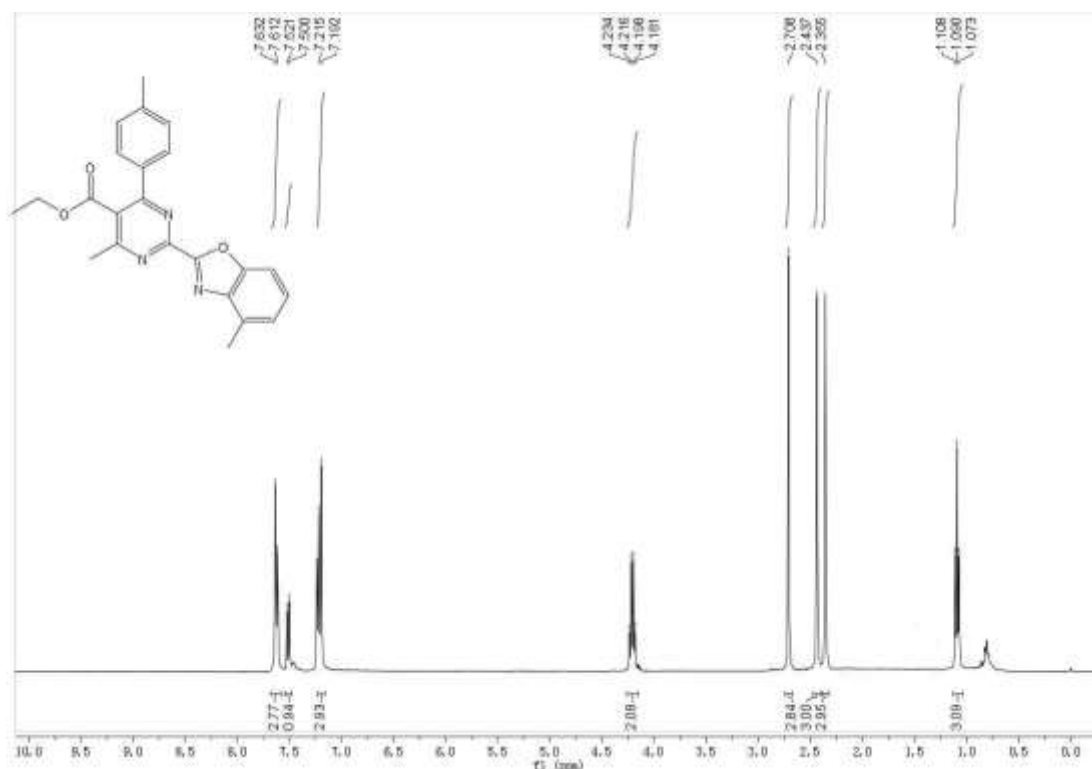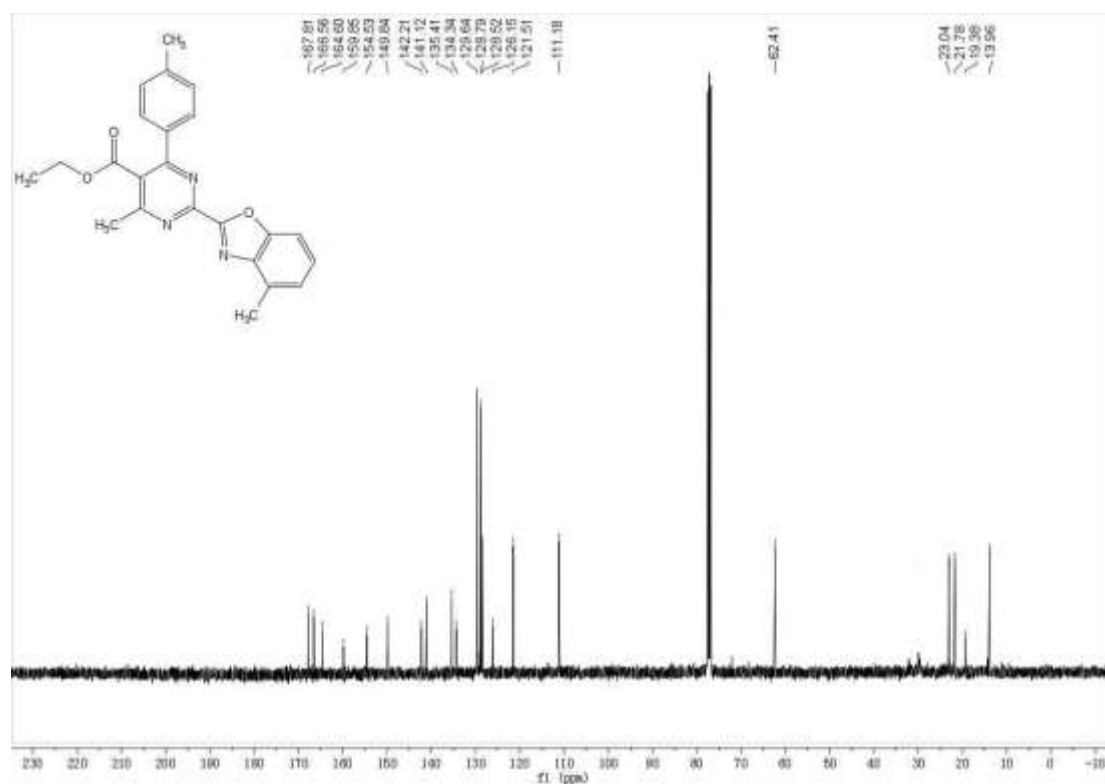

**<sup>1</sup>H and <sup>13</sup>C Spectra of compound 3cb (CDCl<sub>3</sub>, 600 MHz)**

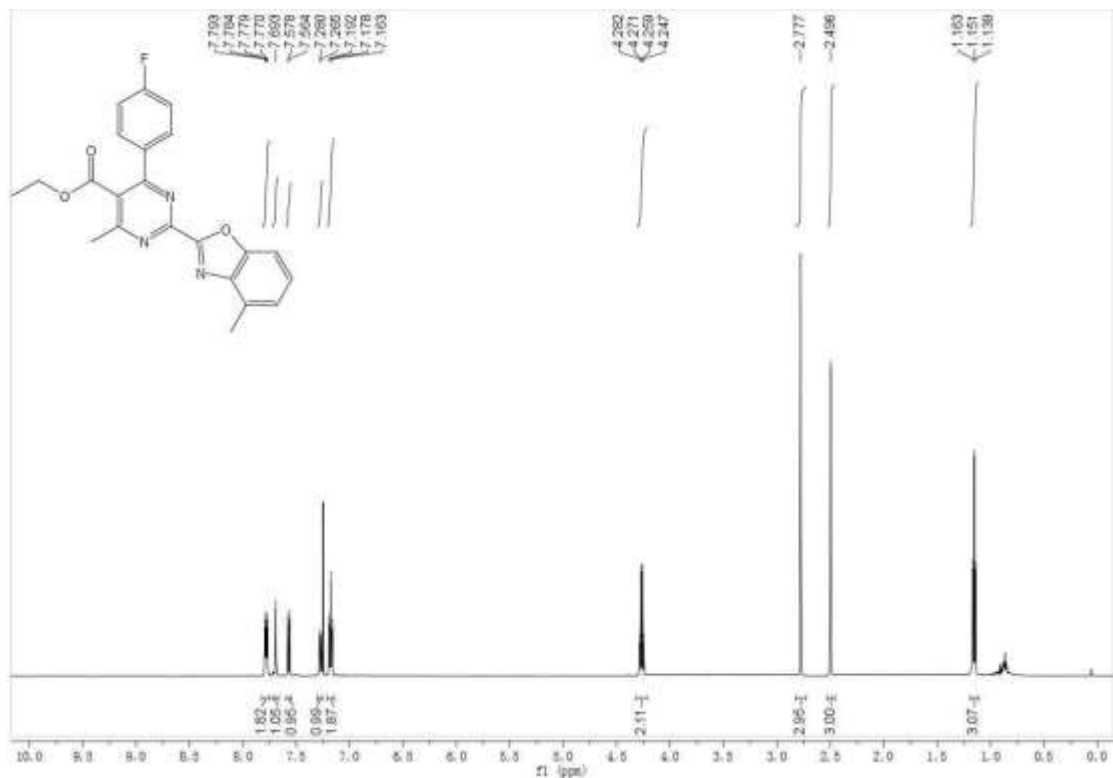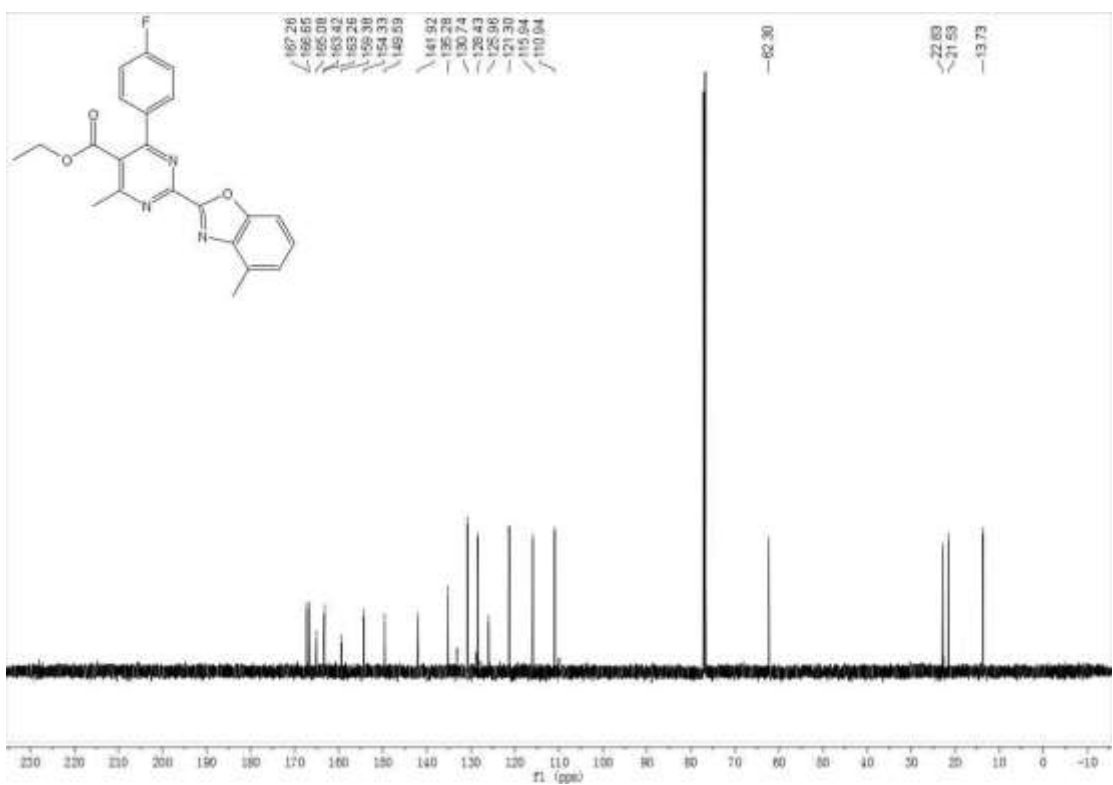

**$^1\text{H}$  and  $^{13}\text{C}$  Spectra of compound 3ac (CDCl<sub>3</sub>, 600 MHz)**

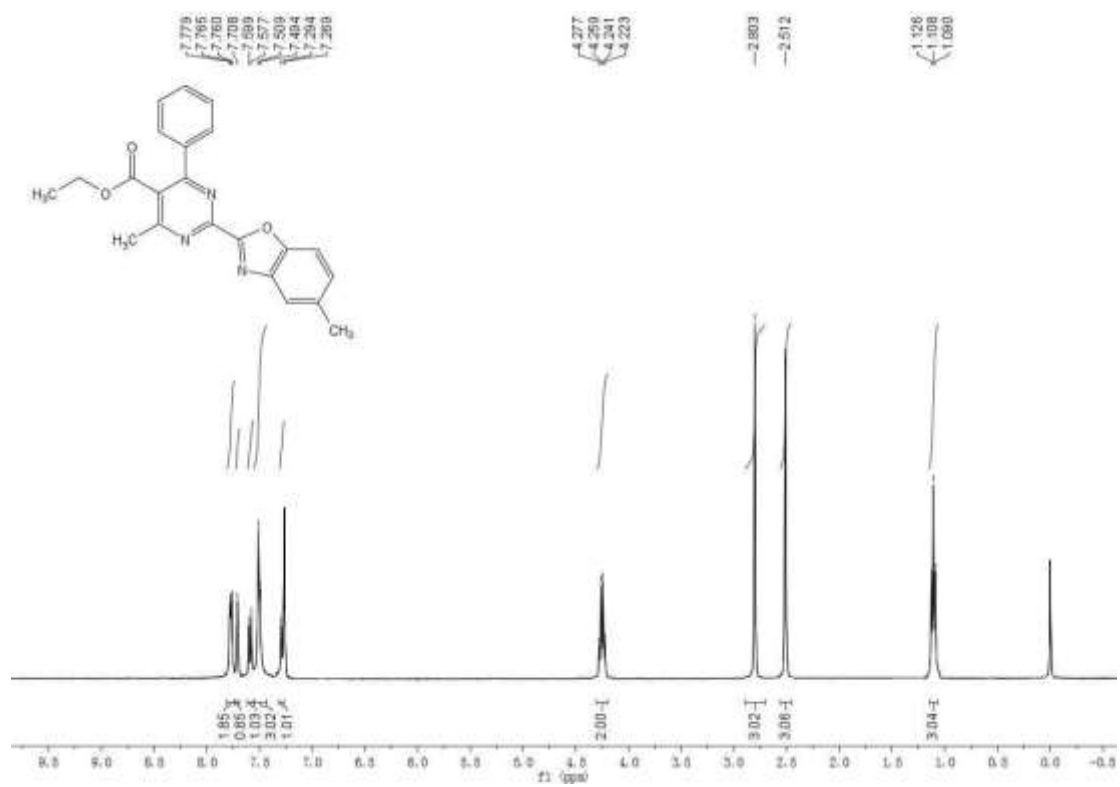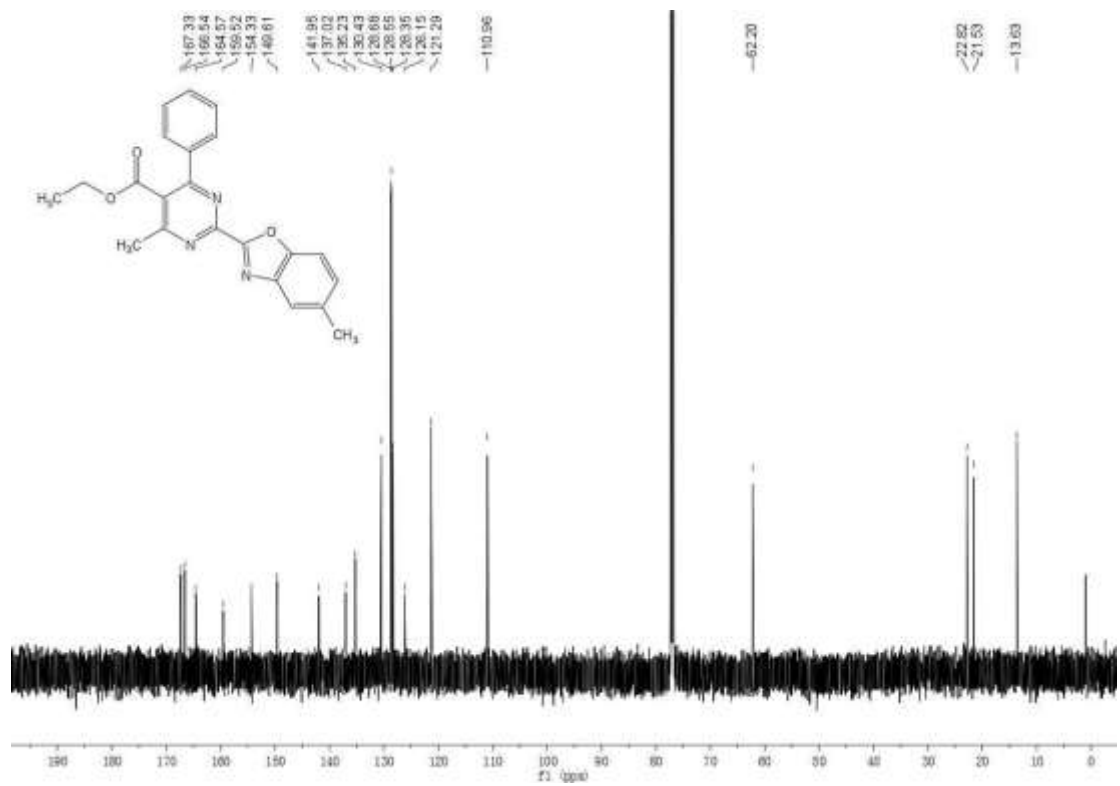

<sup>1</sup>H and <sup>13</sup>C Spectra of compound 3bc (CDCl<sub>3</sub>, 600 MHz)

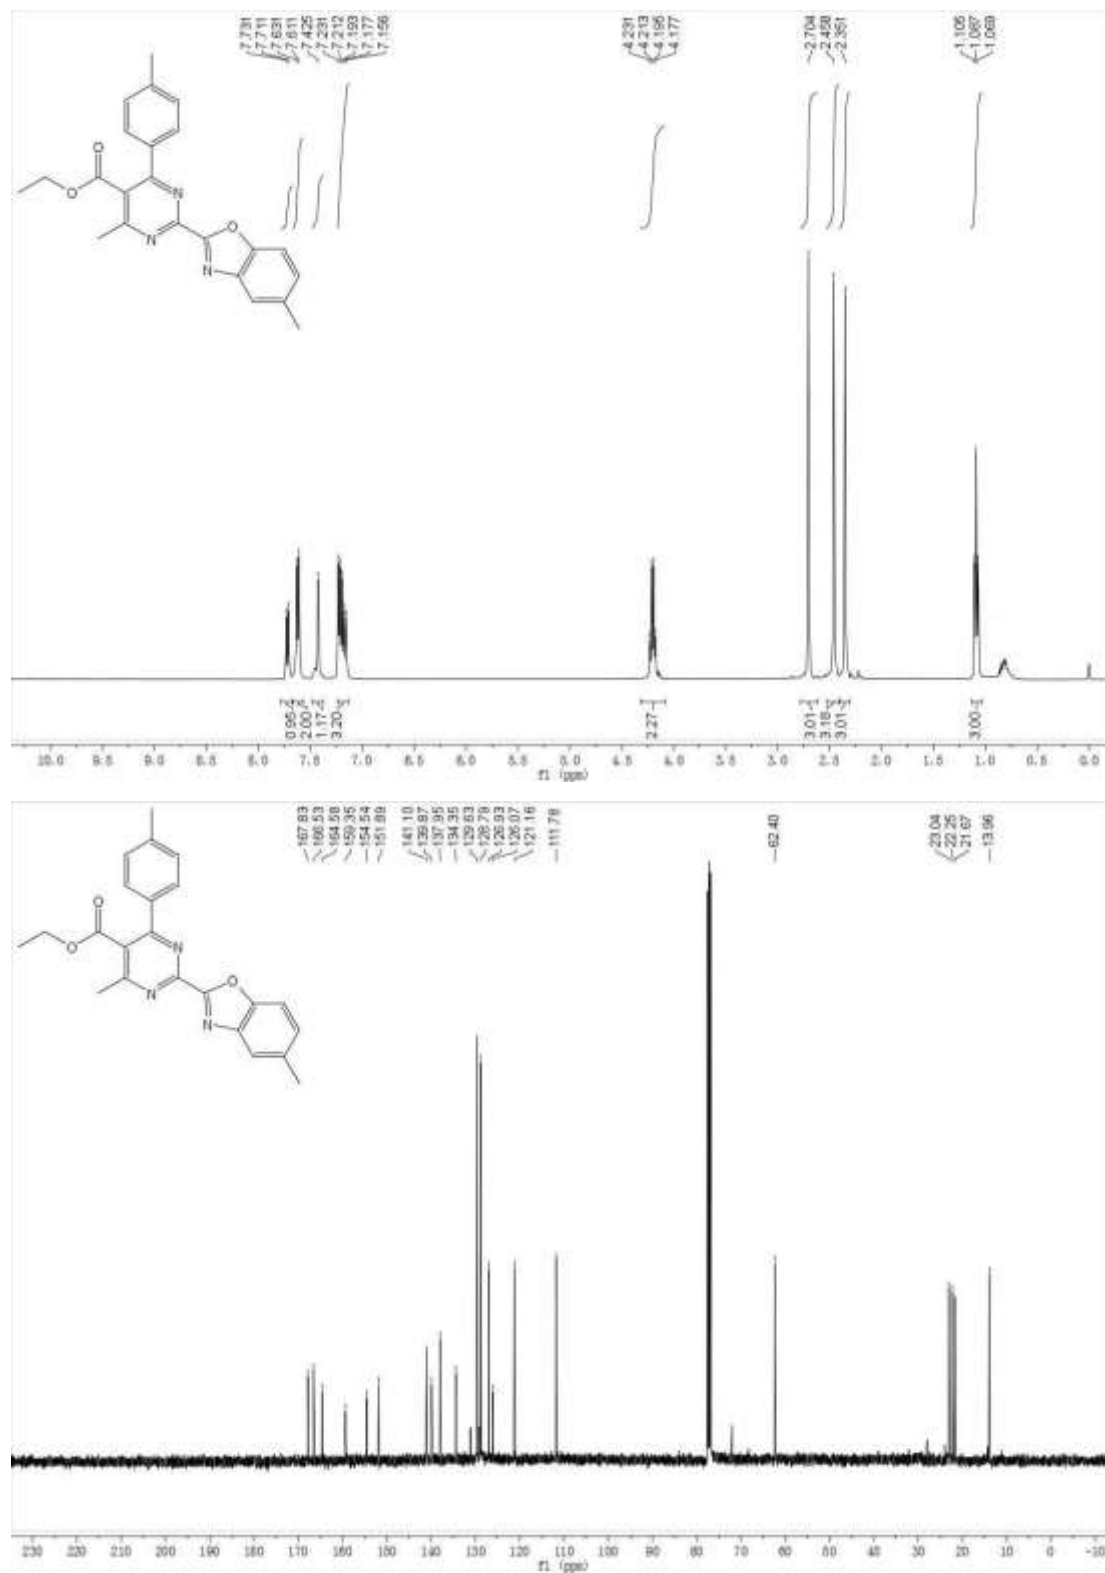



<sup>1</sup>H and <sup>13</sup>C Spectra of compound 3cc (CDCl<sub>3</sub>, 600 MHz)

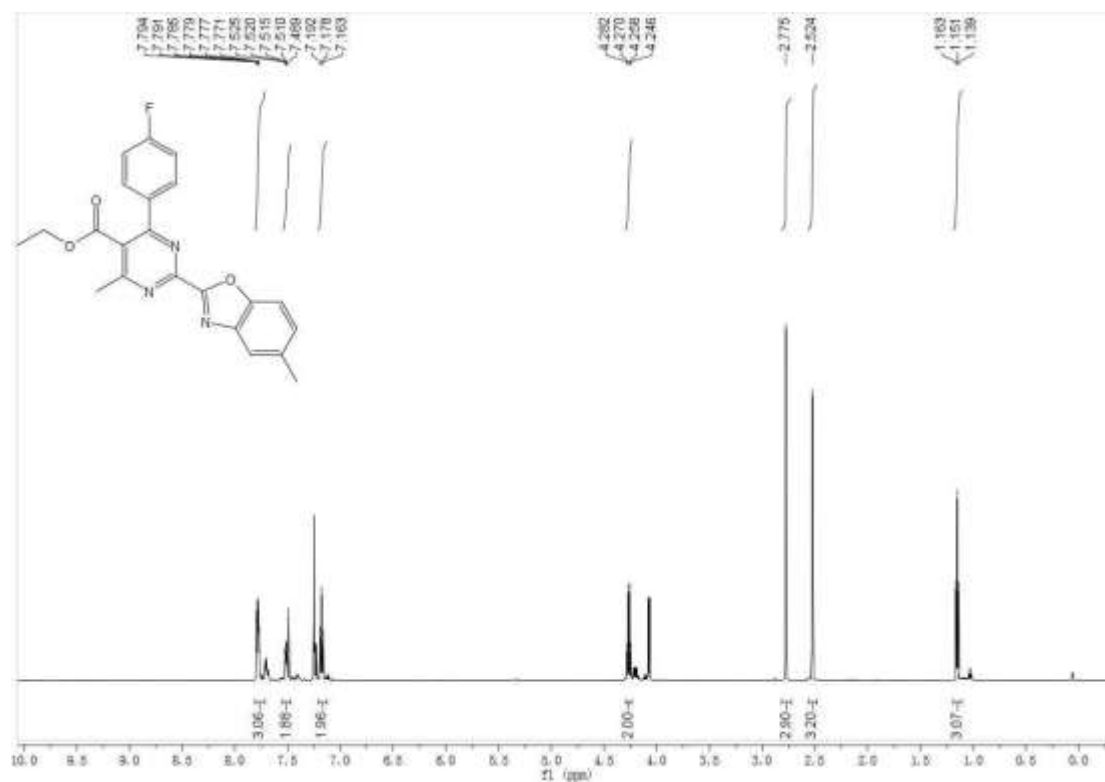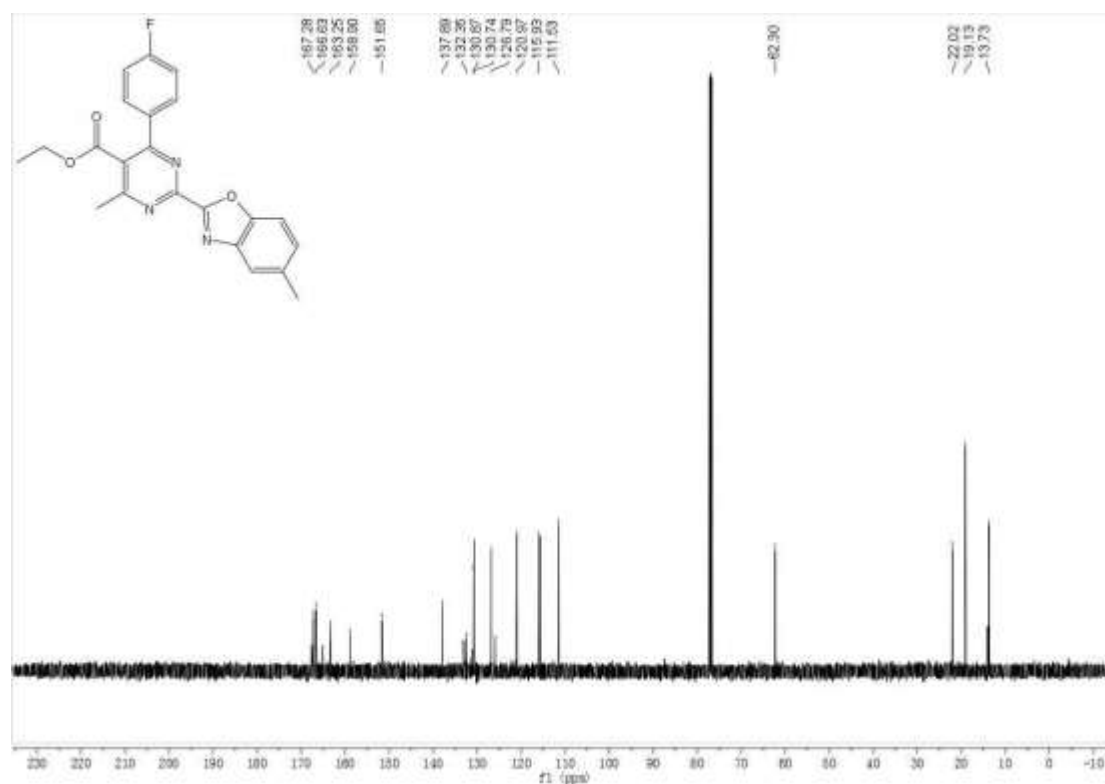

**<sup>1</sup>H and <sup>13</sup>C Spectra of compound 3ad (CDCl<sub>3</sub>, 600 MHz)**

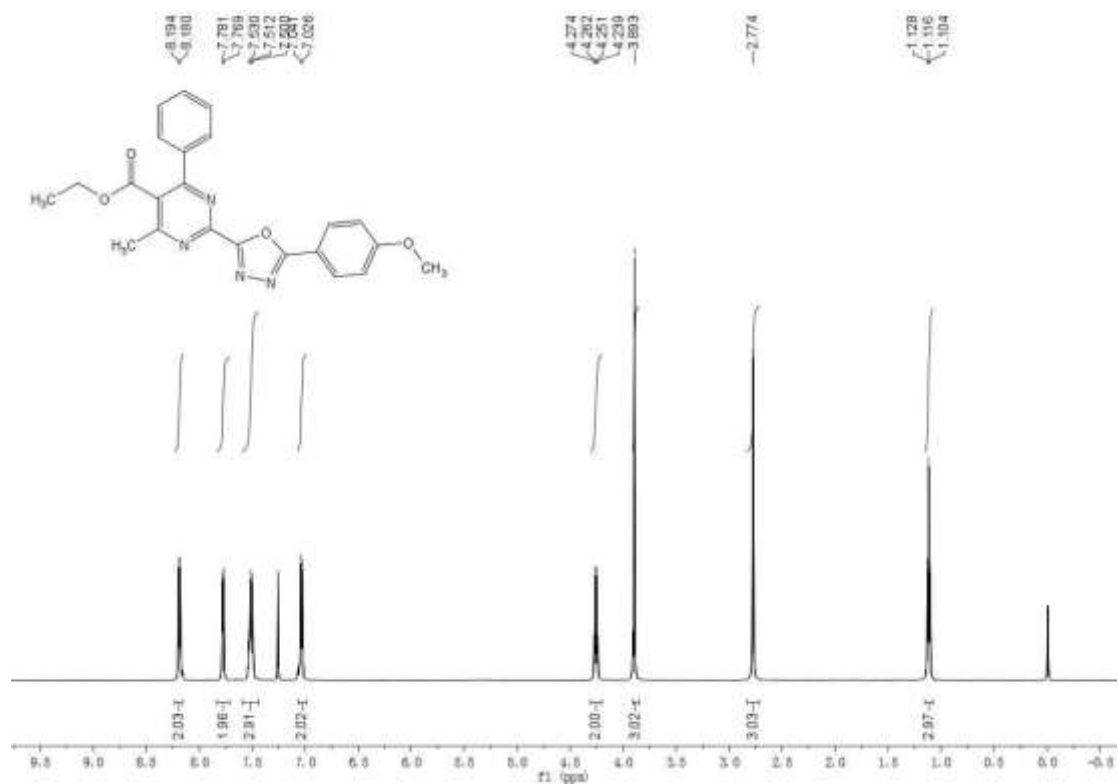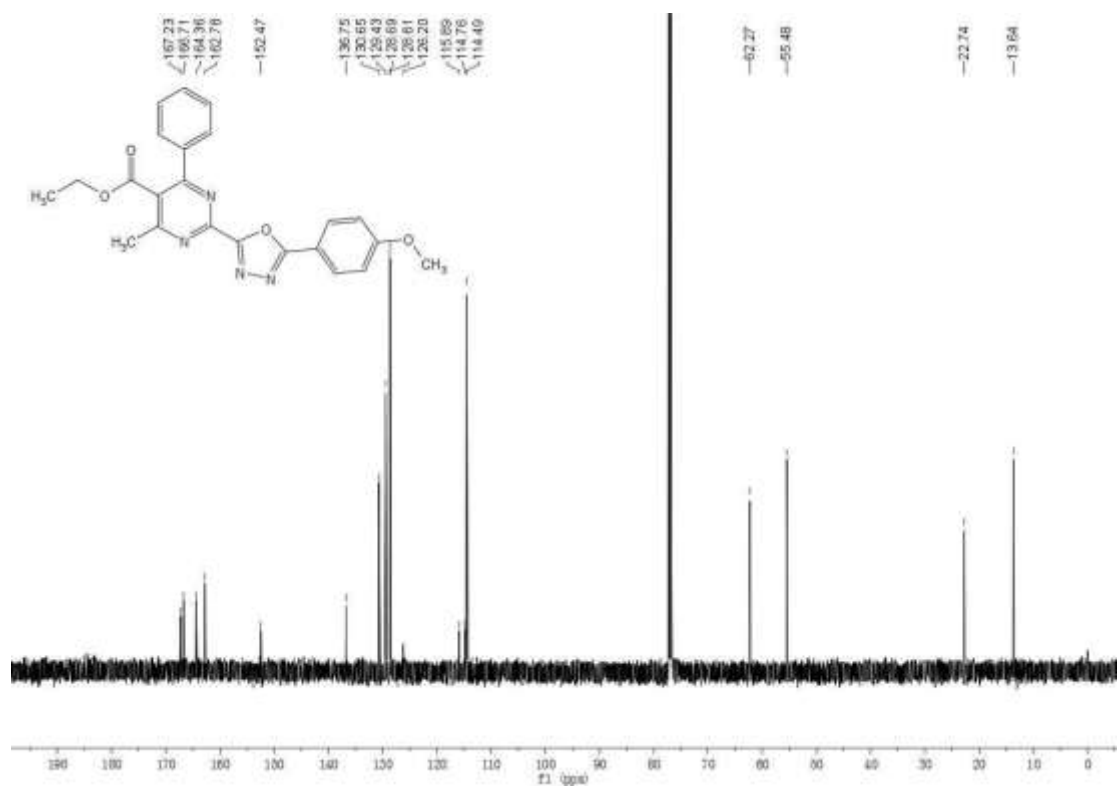

<sup>1</sup>H and <sup>13</sup>C Spectra of compound 3ae (CDCl<sub>3</sub>, 600 MHz)

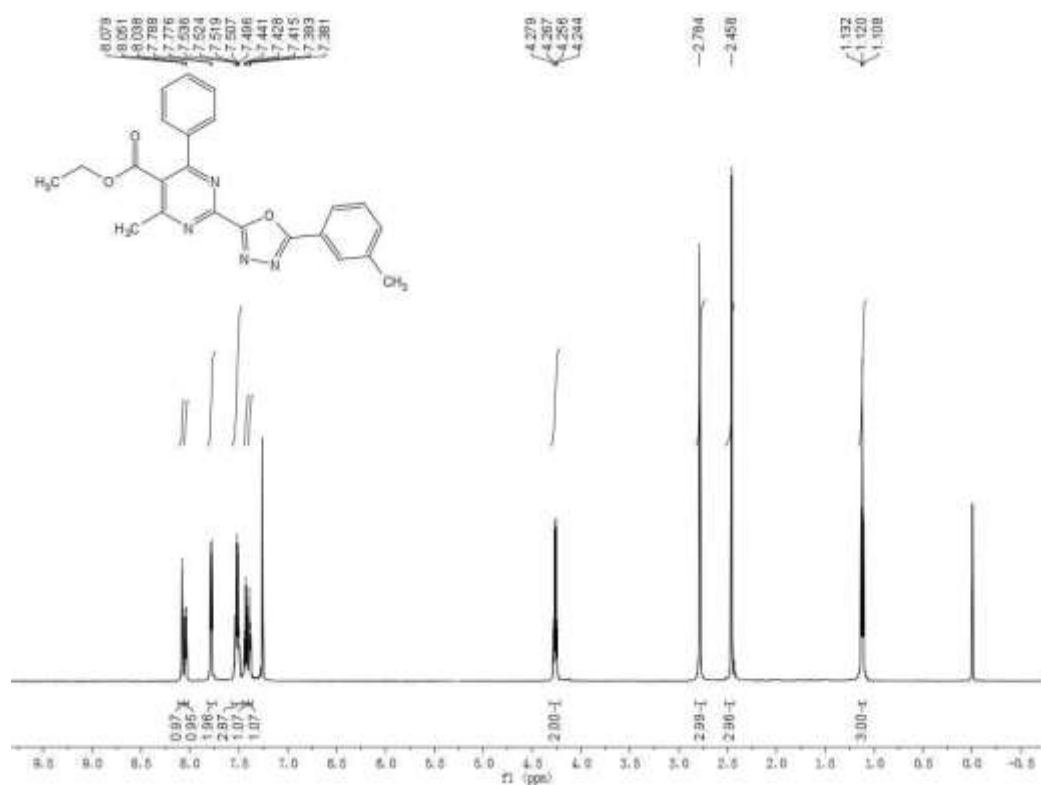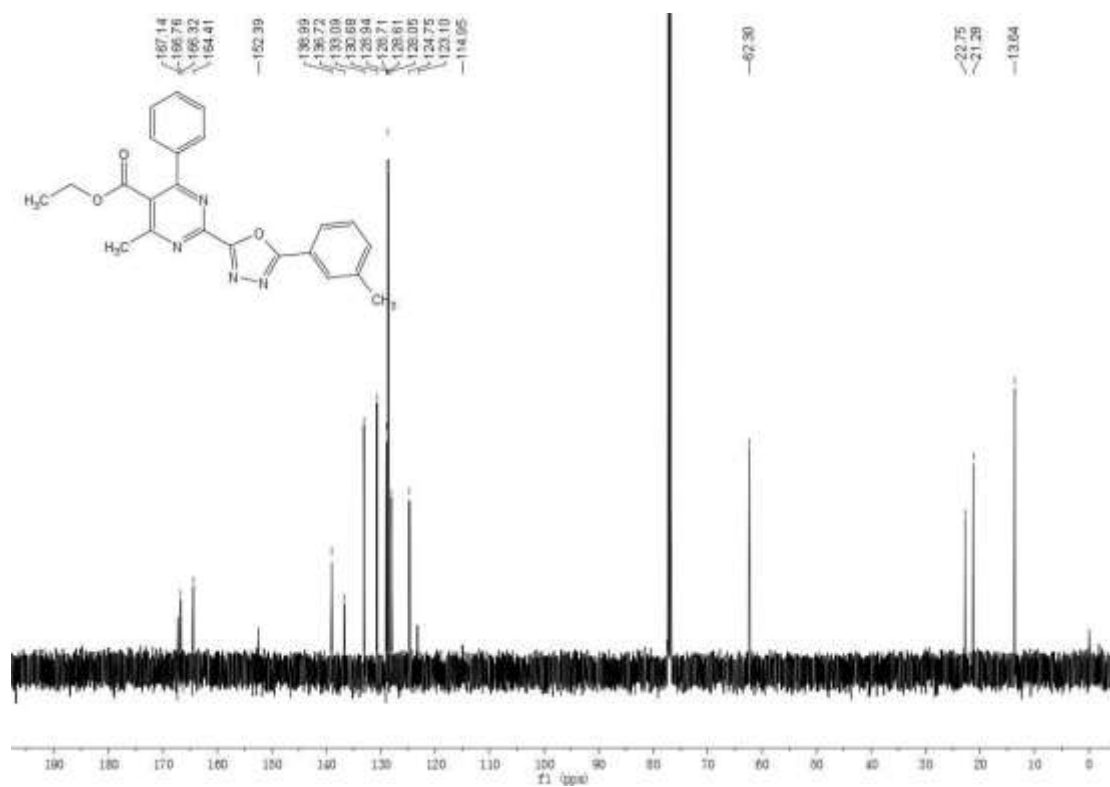

**<sup>1</sup>H and <sup>13</sup>C Spectra of compound 3be (CDCl<sub>3</sub>, 600 MHz)**

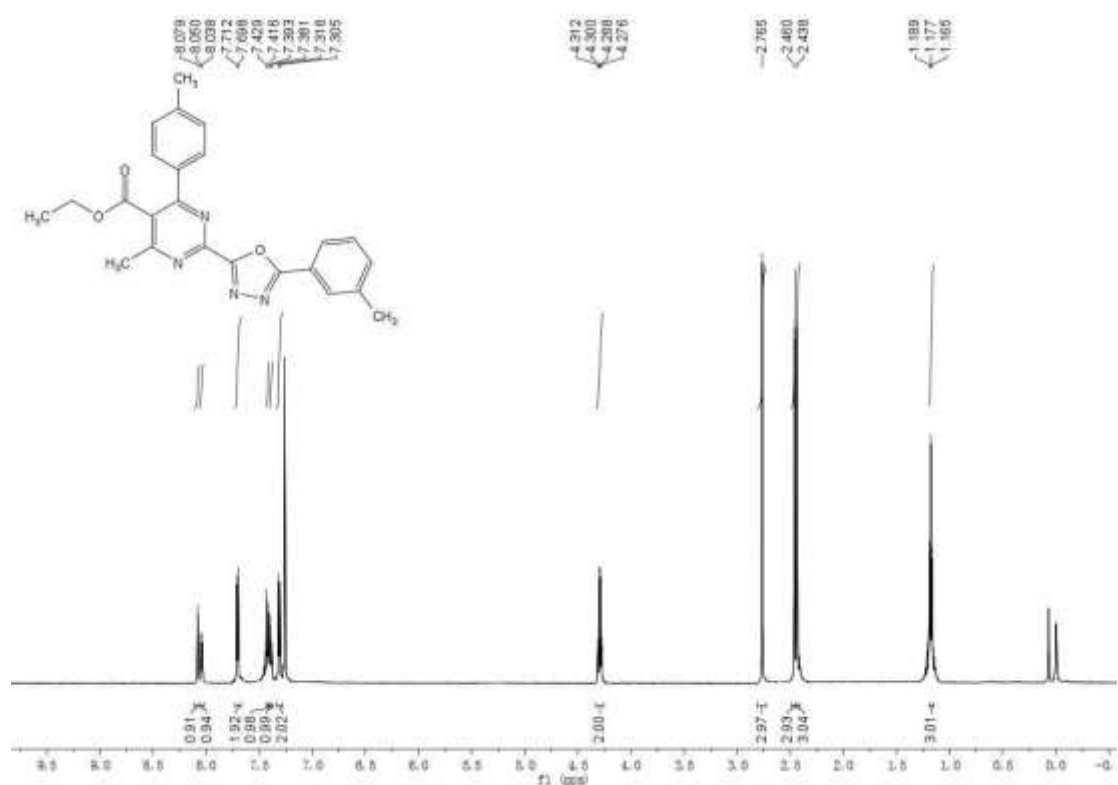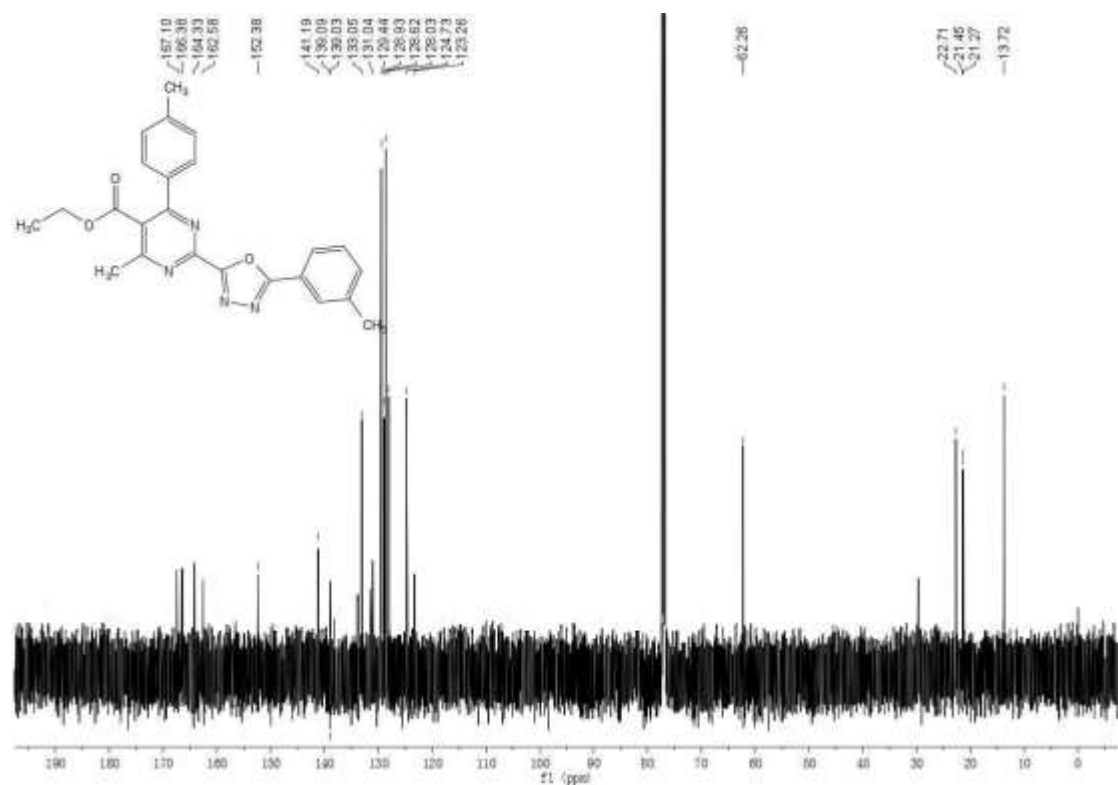

**<sup>1</sup>H and <sup>13</sup>C Spectra of compound 3ce (CDCl<sub>3</sub>, 600 MHz)**

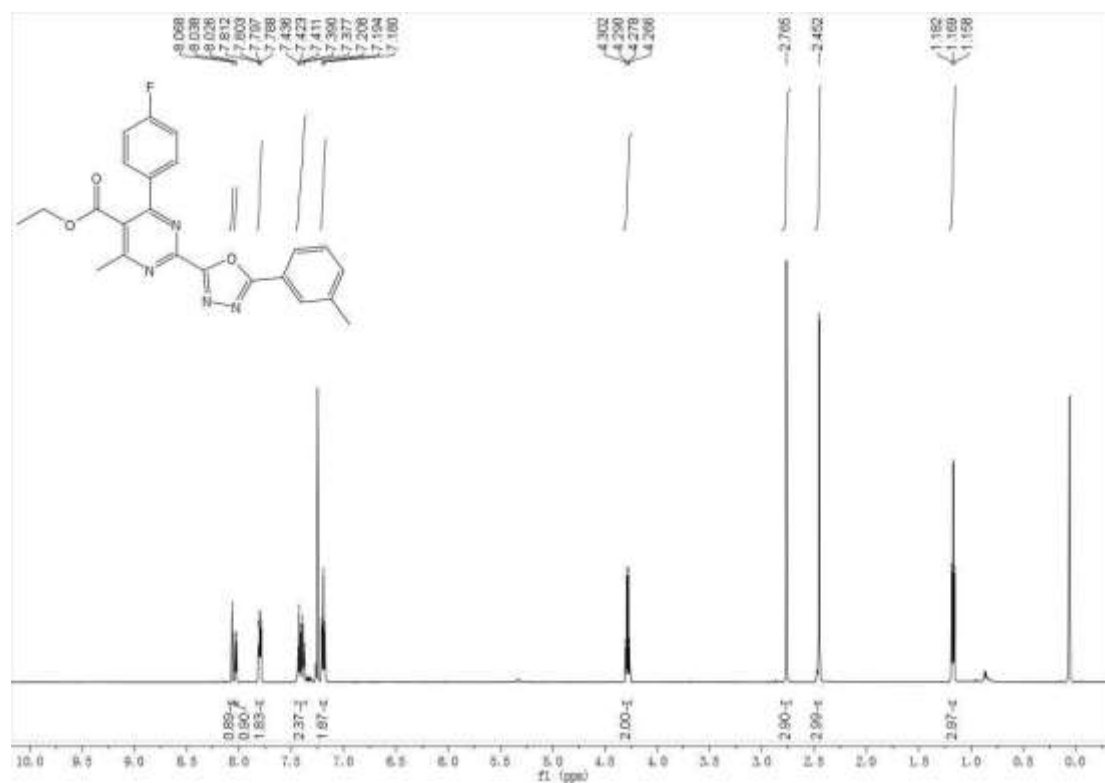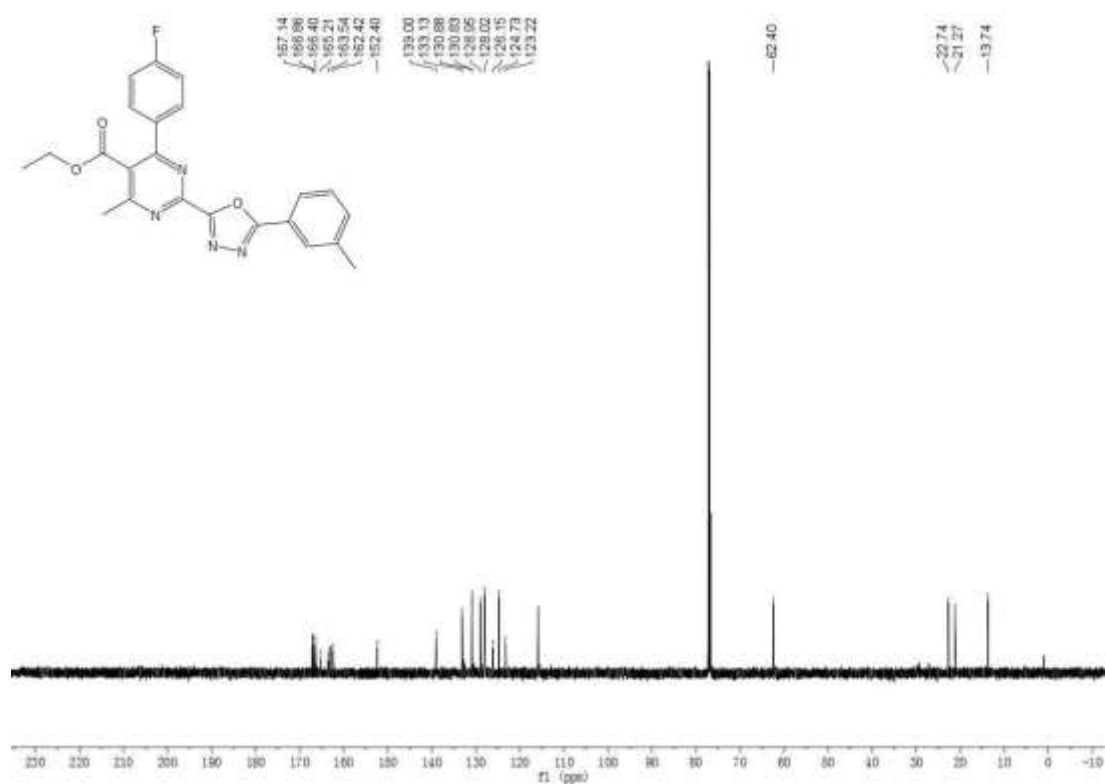

**<sup>1</sup>H and <sup>13</sup>C Spectra of compound 3de (CDCl<sub>3</sub>, 600 MHz)**

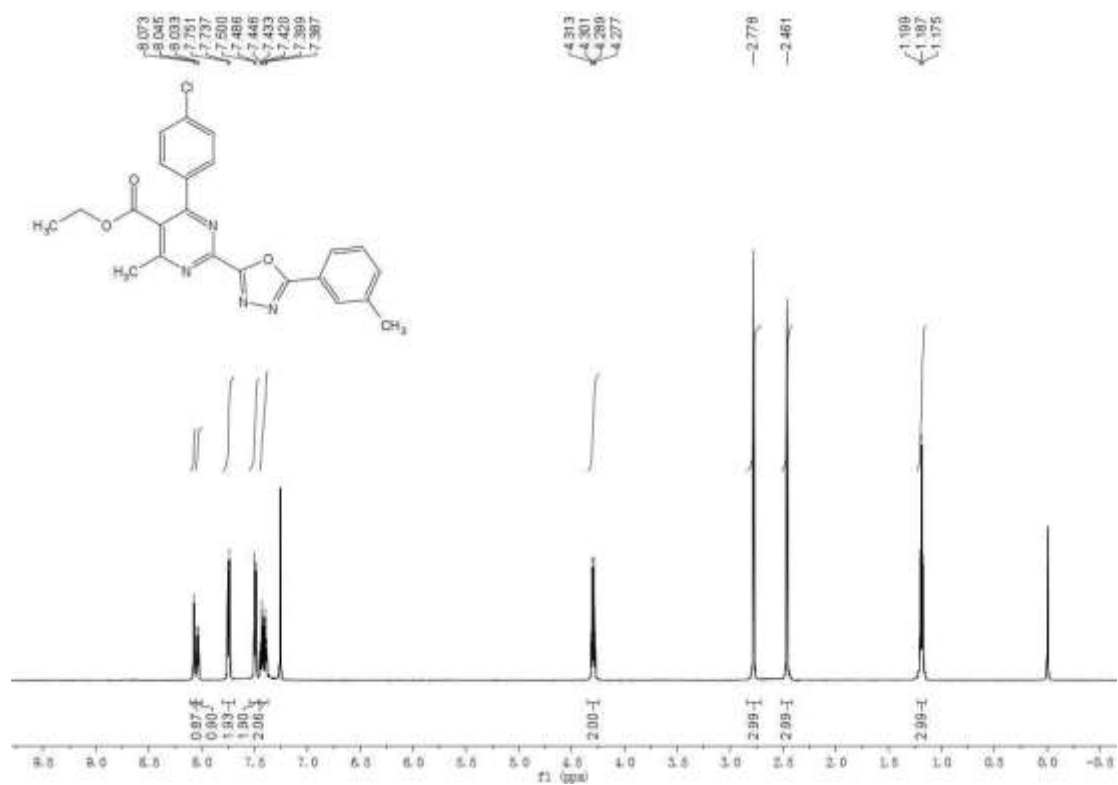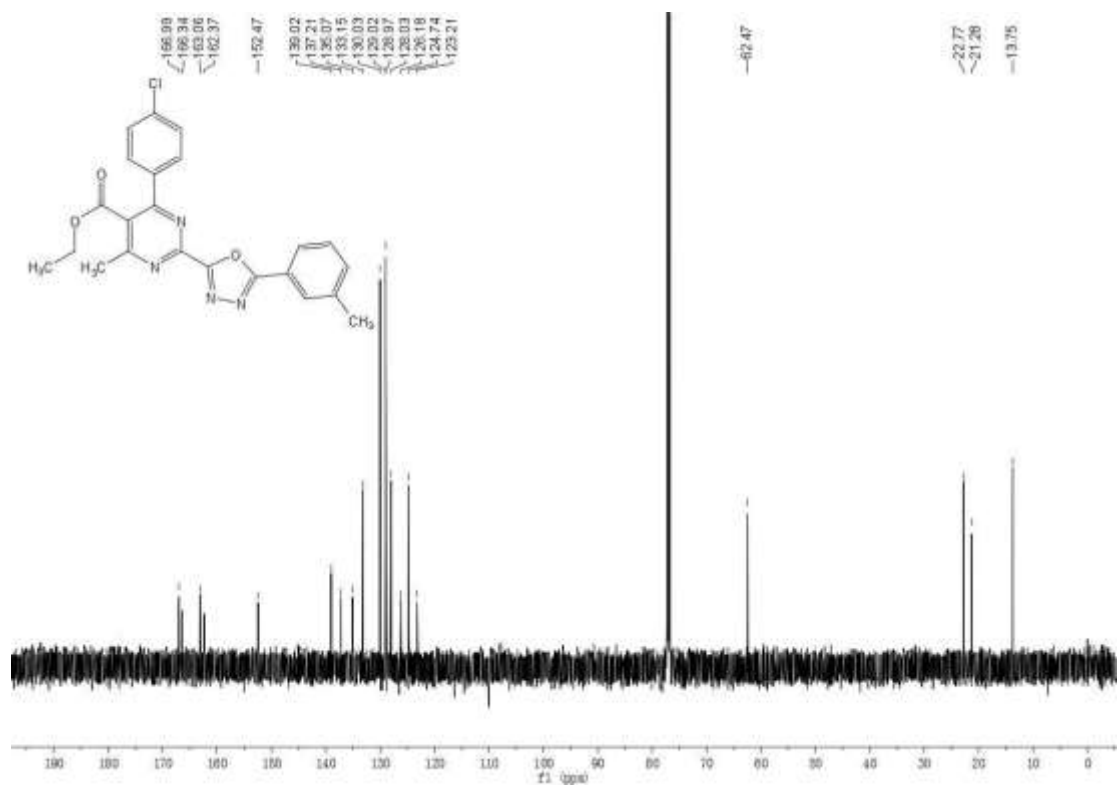

**<sup>1</sup>H and <sup>13</sup>C Spectra of compound 3af (CDCl<sub>3</sub>, 600 MHz)**

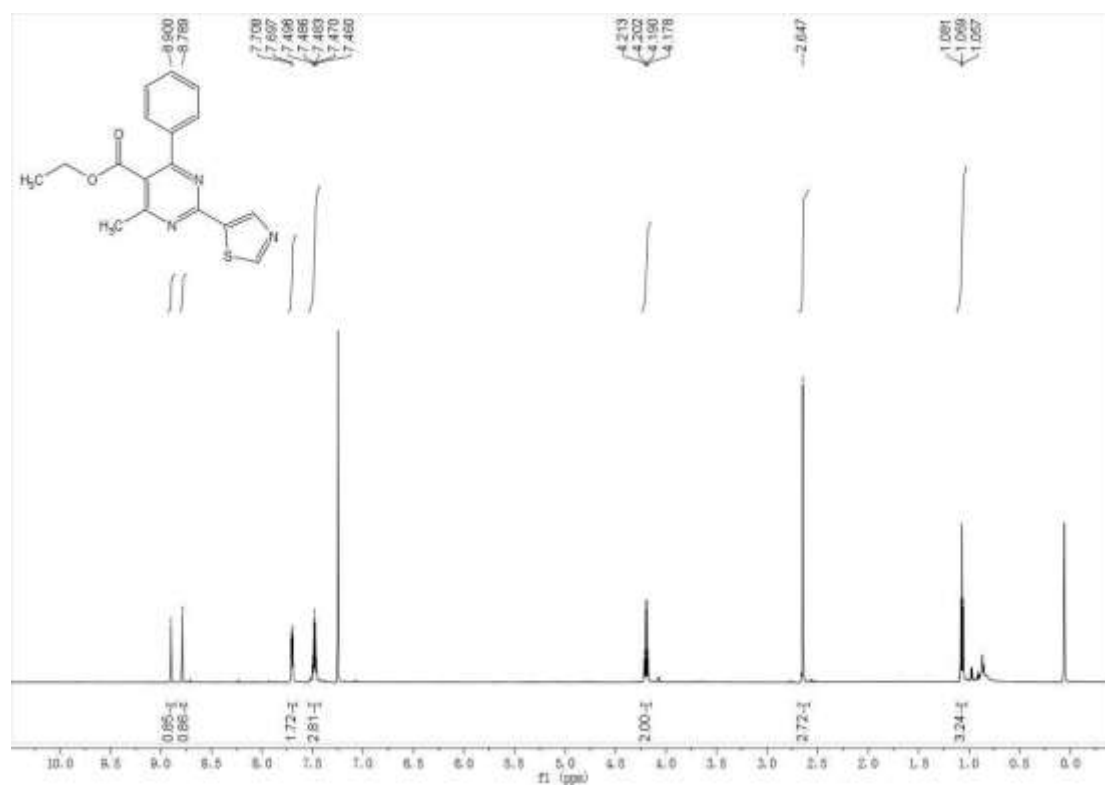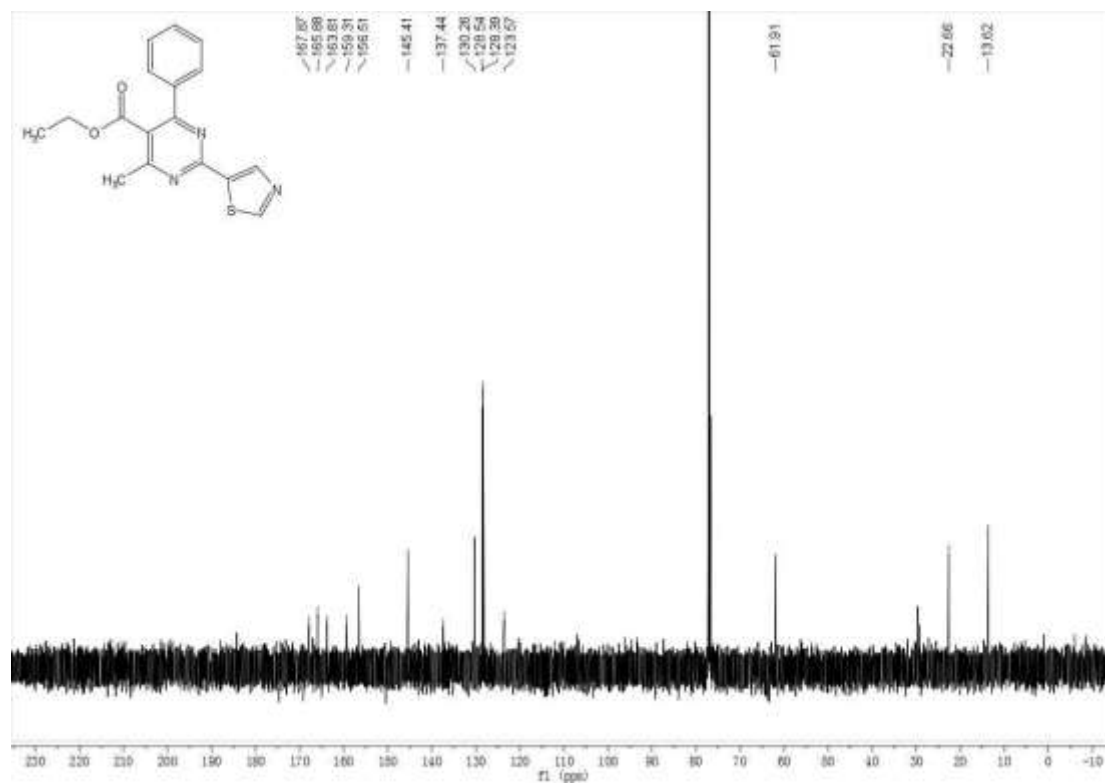

<sup>1</sup>H and <sup>13</sup>C Spectra of compound 3bf (CDCl<sub>3</sub>, 600 MHz)

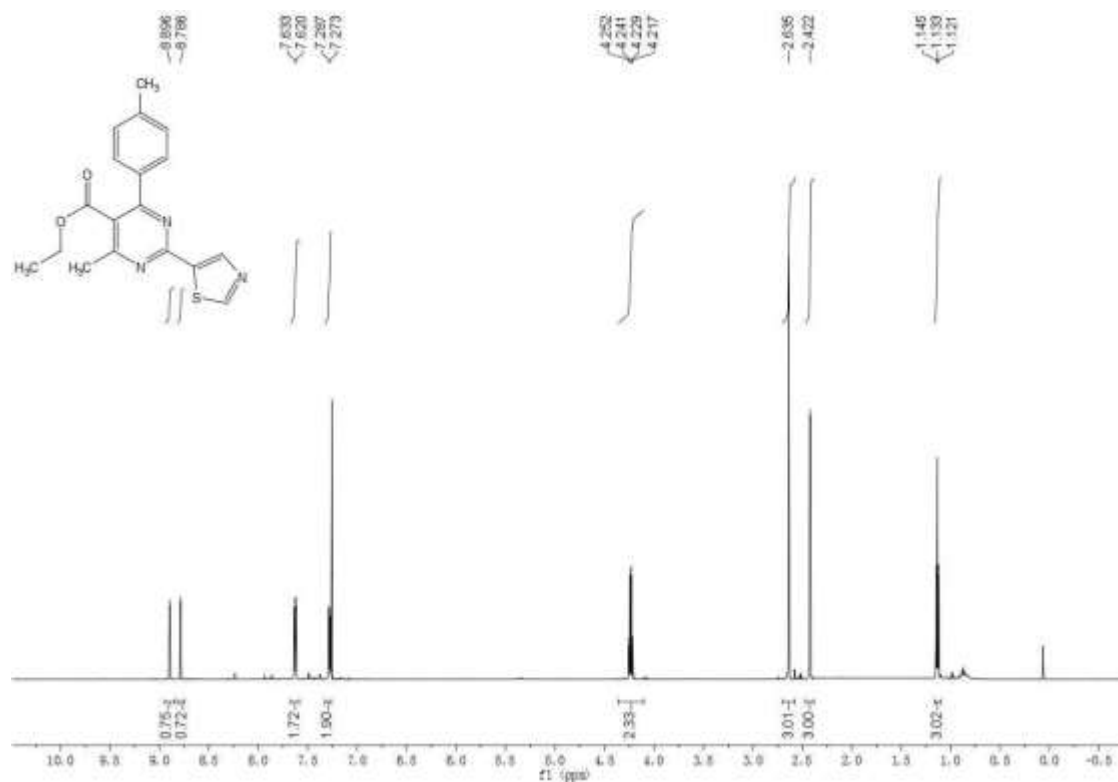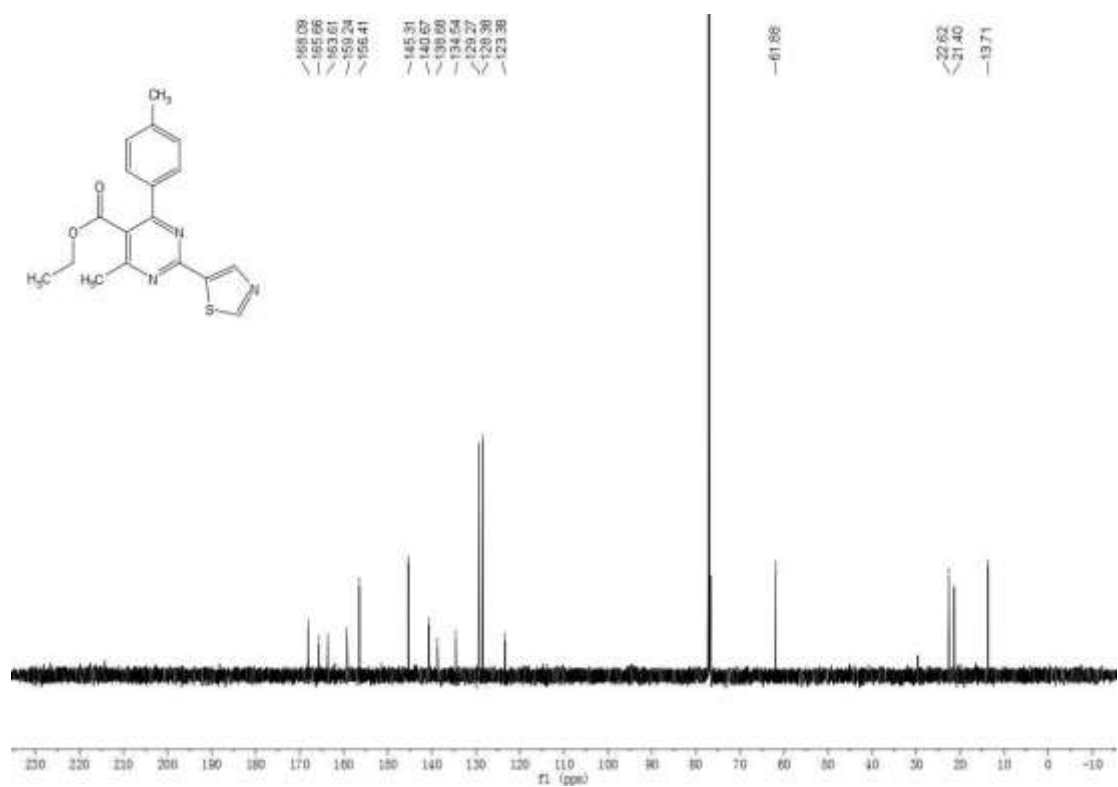



**<sup>1</sup>H and <sup>13</sup>C Spectra of compound 3cf (CDCl<sub>3</sub>, 600 MHz)**

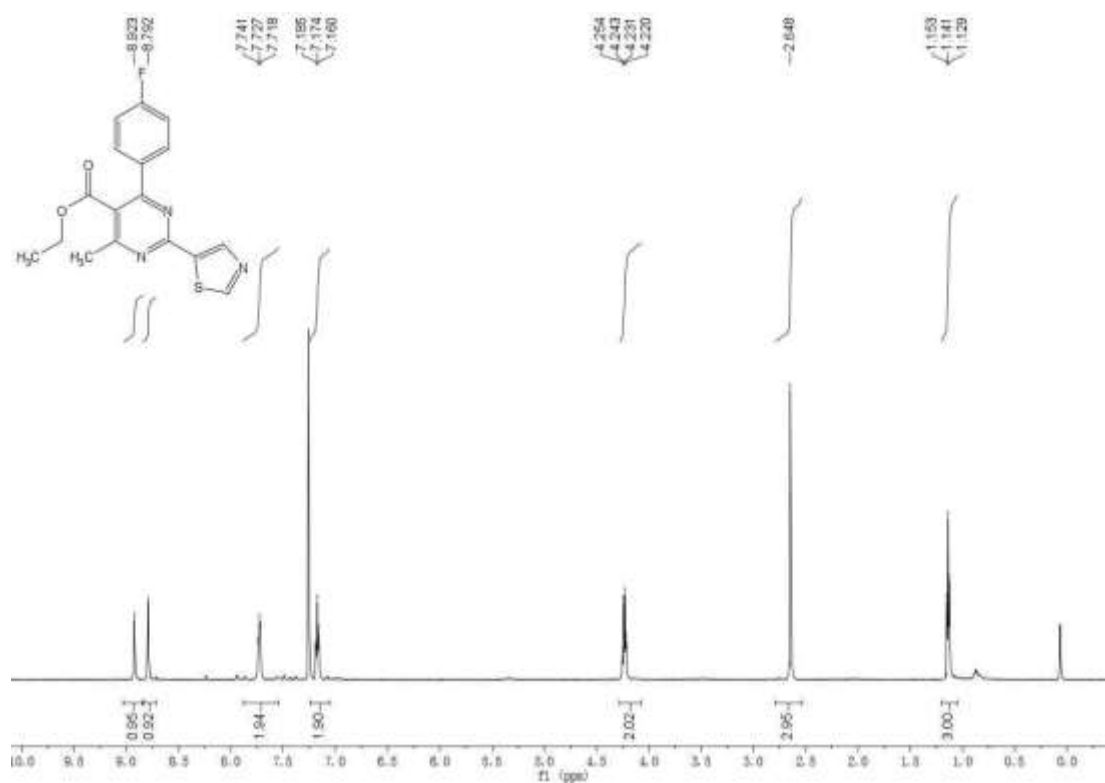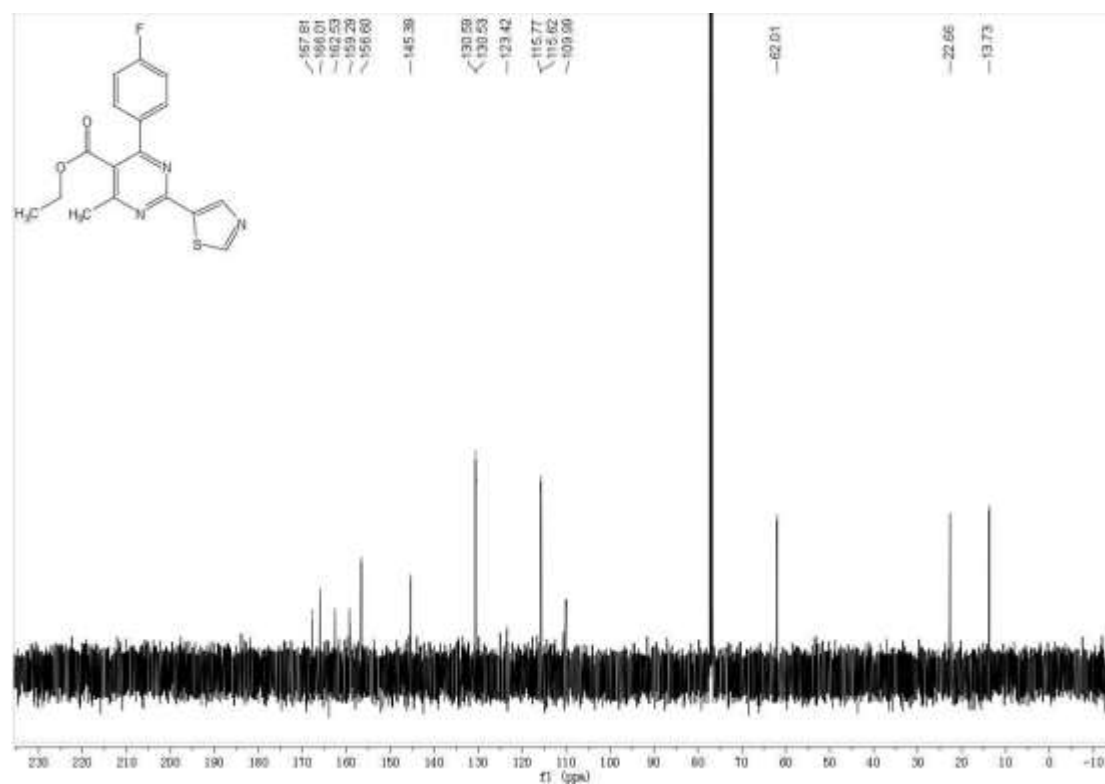

**<sup>1</sup>H and <sup>13</sup>C Spectra of compound 3ja (CDCl<sub>3</sub>, 600 MHz)**

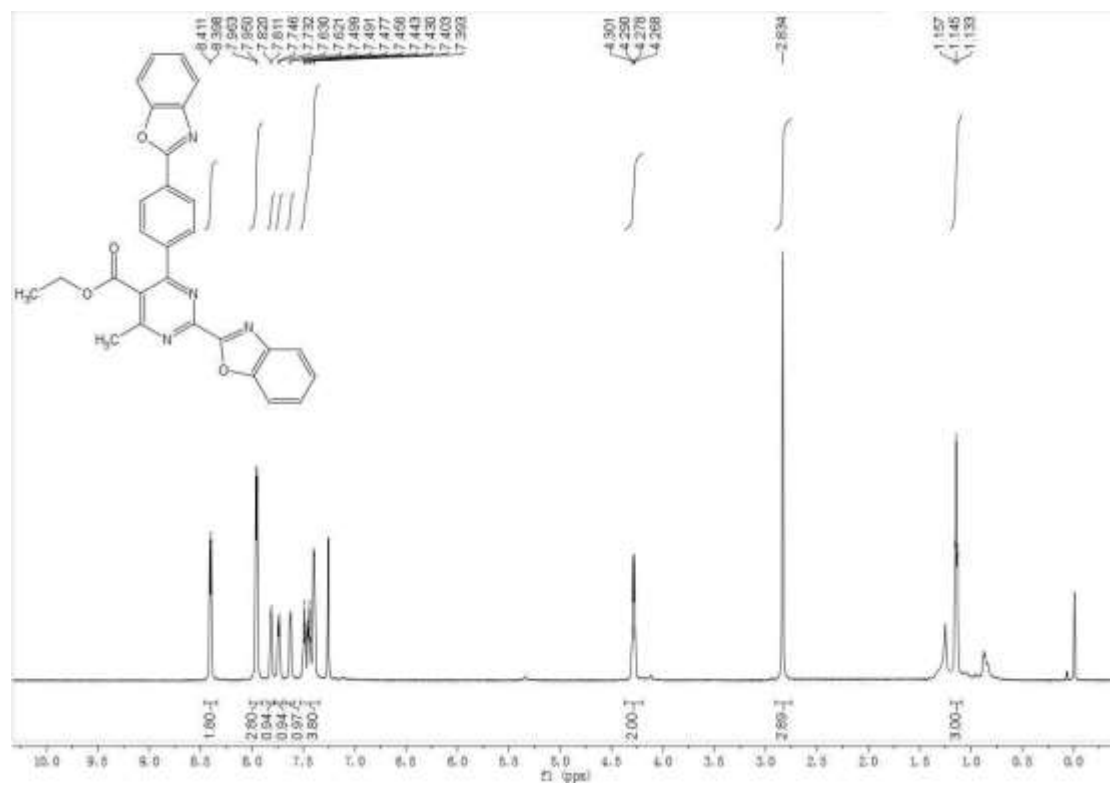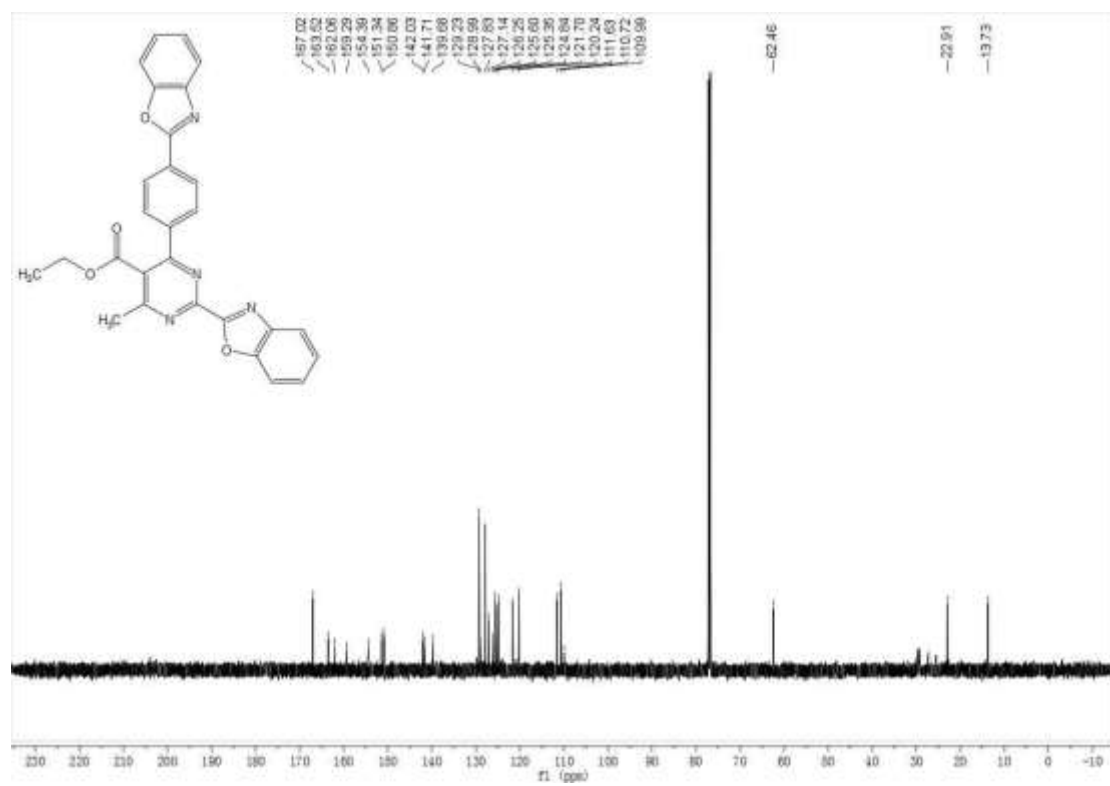

**<sup>1</sup>H and <sup>13</sup>C Spectra of compound 5aa (CDCl<sub>3</sub>, 600 MHz)**

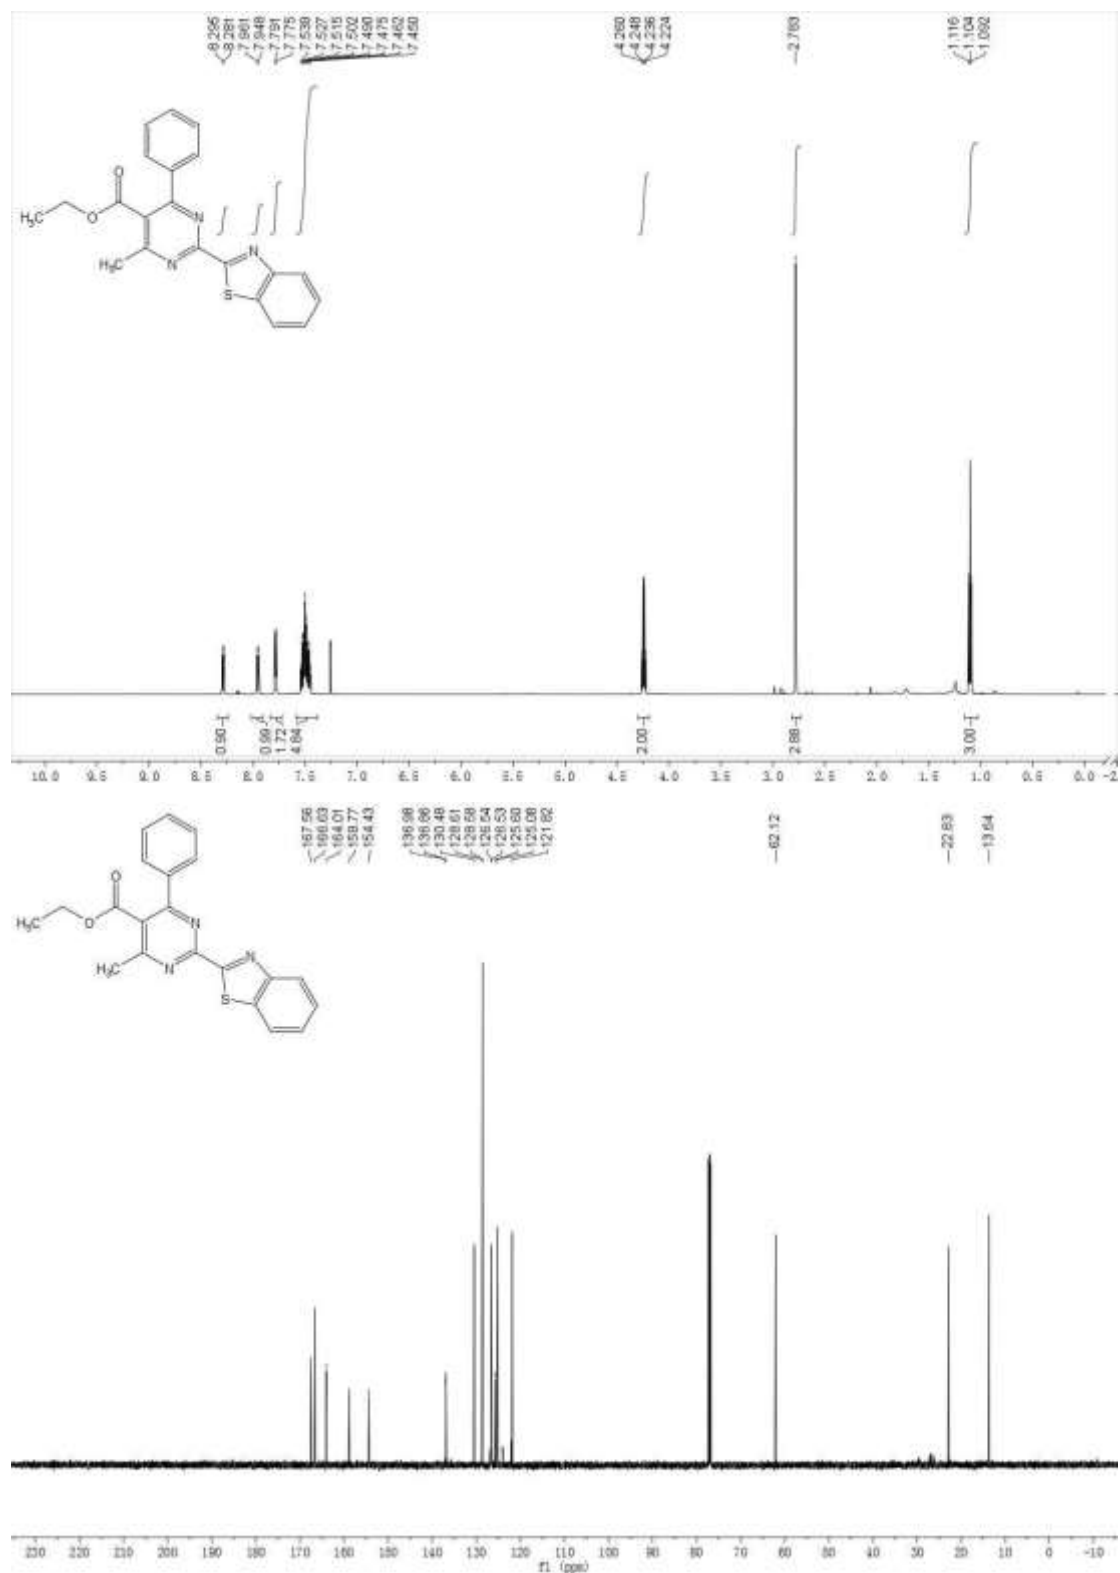

**<sup>1</sup>H and <sup>13</sup>C Spectra of compound 5ba (CDCl<sub>3</sub>, 600 MHz)**

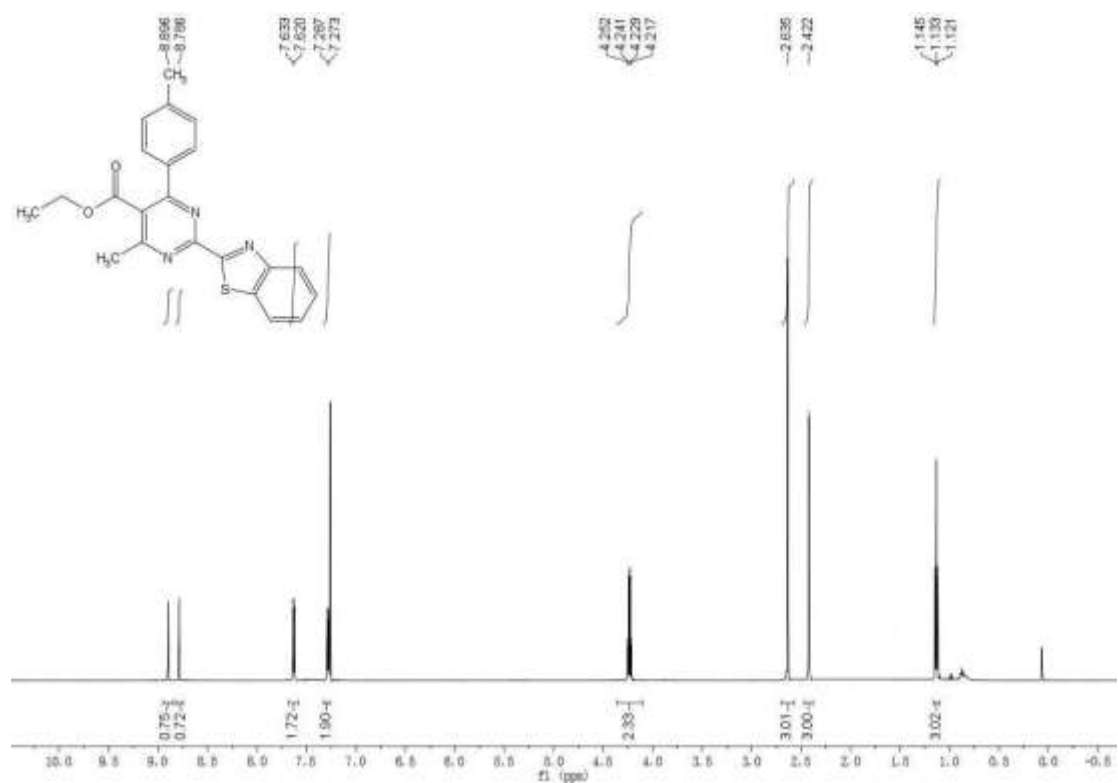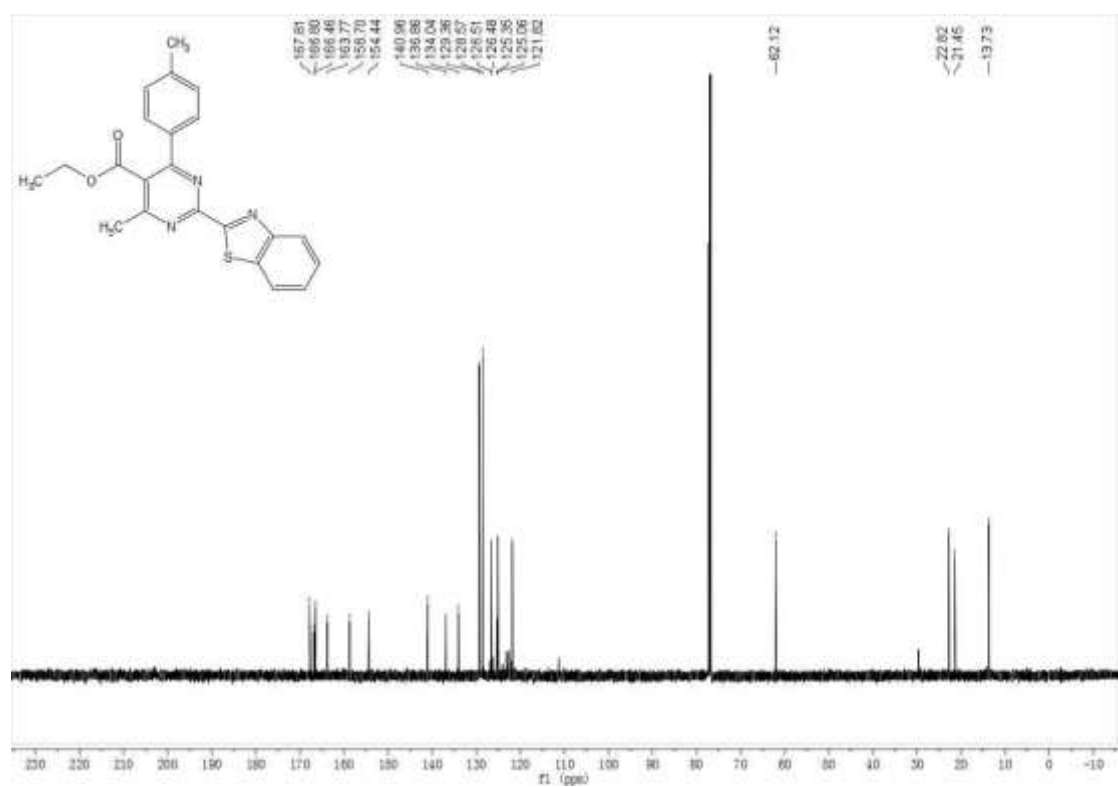

**<sup>1</sup>H and <sup>13</sup>C Spectra of compound 5da (CDCl<sub>3</sub>, 600 MHz)**

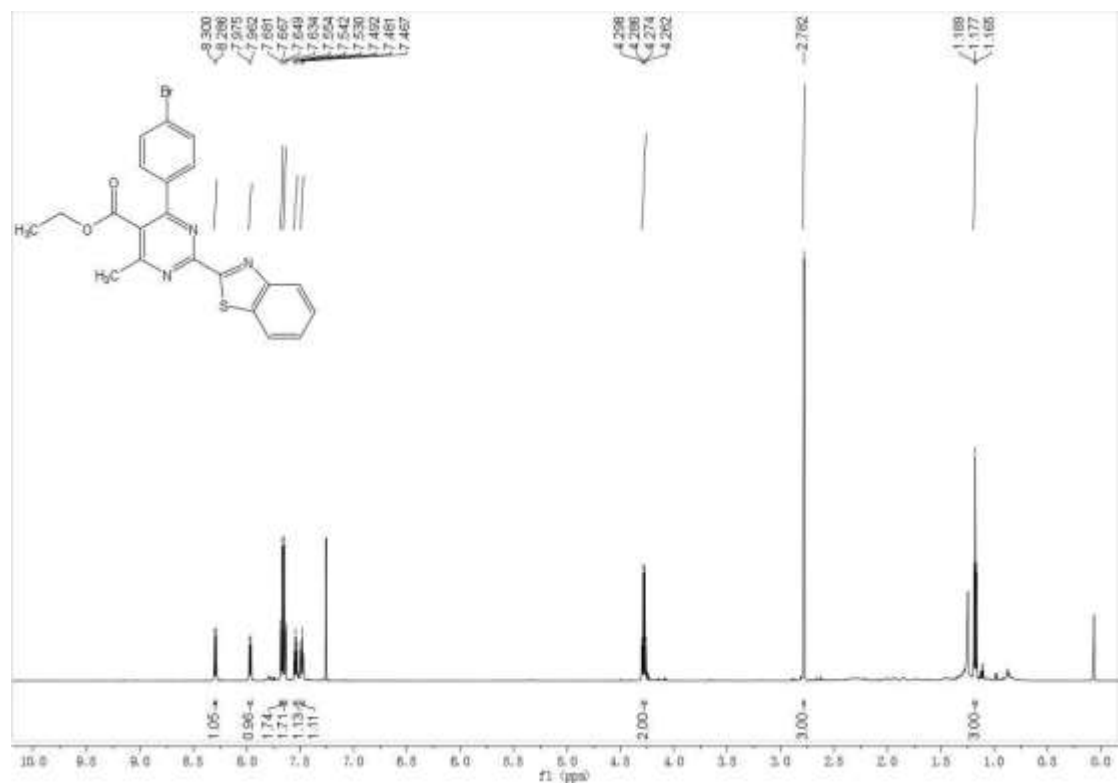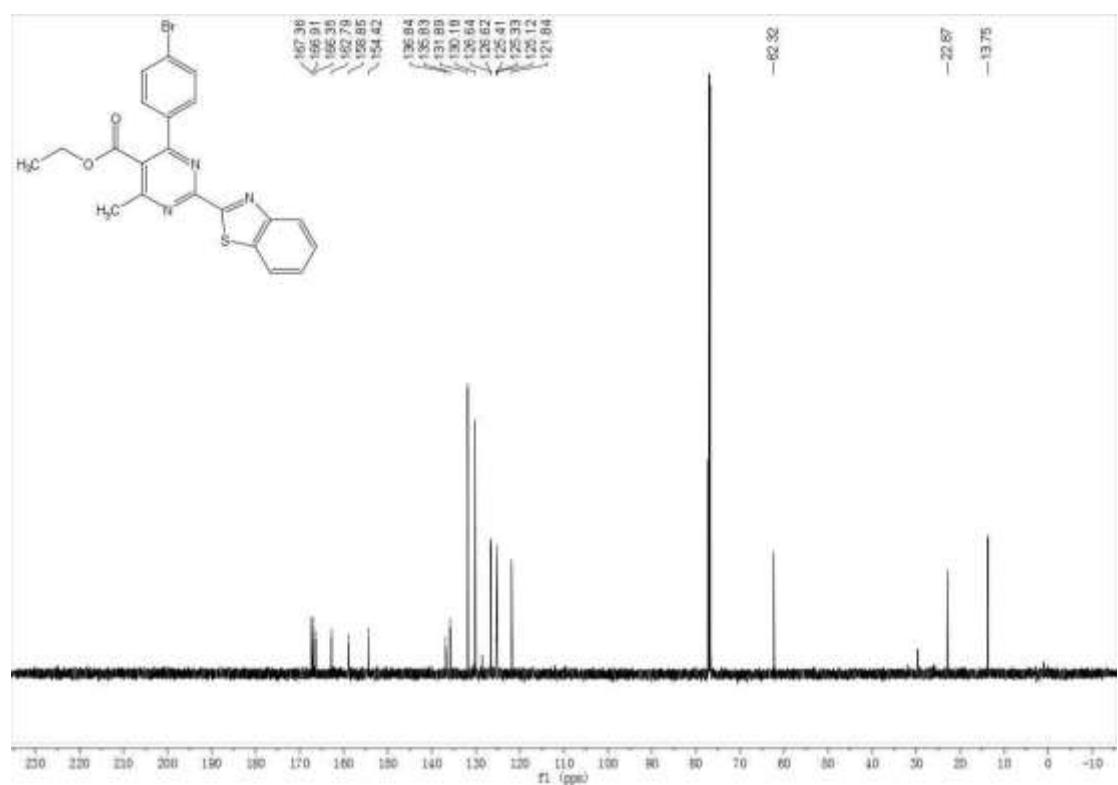

Supplement: c6ra18997k1.pdf [file c6ra18997k1.pdf]
